# Supplementary material for: Anti-neuroinflammatory asarone derivatives from the rhizomes of Acorus tatarinowii
Source: Royal Society of Chemistry journal article supplement (doi:10.1039/c6ra27786a), 2017-01-01

## Anti-neuroinflammatory asarone derivatives from the rhizomes of *Acorus tatarinowii*

Da-Peng Qin,<sup>‡a</sup> Xiao-Lin Feng,<sup>‡a</sup> Wei-Yang Zhang,<sup>d</sup> Hao Gao,<sup>a</sup> Xiao-Rui Cheng,<sup>c</sup> Wen-Xia Zhou,<sup>c</sup> Yang Yu,<sup>a, b\*</sup> and Xin-Sheng Yao<sup>a\*</sup>

<sup>a</sup> *Institute of Traditional Chinese Medicine & Natural Products, College of Pharmacy, Jinan University, Guangzhou 510632, P. R. China. E-mail: [1018yuyang@163.com](mailto:1018yuyang@163.com); [tyaoxs@jnu.edu.cn](mailto:tyaoxs@jnu.edu.cn). Tel (Fax): +86-20-85221559*

<sup>b</sup> *State Key Laboratory of Bioactive Substance and Function of Natural Medicines, Institute of Materia Medica, Chinese Academy of Medical Sciences and Peking Union Medical College, Beijing 100050, P. R. China*

<sup>c</sup> *Beijing Institute of Pharmacology and Toxicology, Tai Ping Road 27, Beijing 100850, P. R. China*

<sup>d</sup> *State Key Laboratory of Quality Research in Chinese Medicine, Macau University of Science and Technology, Macau, P. R. China*

### List of Supporting Information

|                                                                               |    |
|-------------------------------------------------------------------------------|----|
| UV, IR, HR-ESI-MS spectrum and NMR spectra of <b>1</b> .....                  | 1  |
| UV, IR, HR-ESI-MS spectrum and NMR spectra of <b>2</b> .....                  | 5  |
| UV, IR, HR-ESI-MS spectrum and NMR spectra of <b>3</b> .....                  | 8  |
| UV, IR, HR-ESI-MS spectrum and NMR spectra of <b>4</b> .....                  | 12 |
| UV, IR, HR-ESI-MS spectrum and NMR spectra of <b>5</b> .....                  | 15 |
| UV, IR, HR-ESI-MS spectrum and NMR spectra of <b>6</b> .....                  | 18 |
| UV, IR, HR-ESI-MS spectrum and NMR spectra of <b>7</b> .....                  | 22 |
| Chiral HPLC analytical chromatograms of compounds <b>2, 3, 7, 8, 14</b> ..... | 26 |
| Purity of compound.....                                                       | 28 |
| ECD spectrum of <b>8</b> and <b>14</b> .....                                  | 28 |

### UV spectrum of meso-asarolignan A (1) in CH<sub>3</sub>OH.

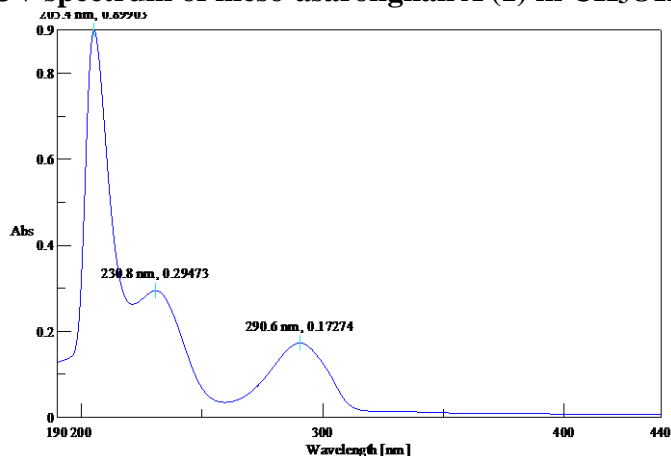

### IR (KBr disc) spectrum of meso-asarolignan A (1).

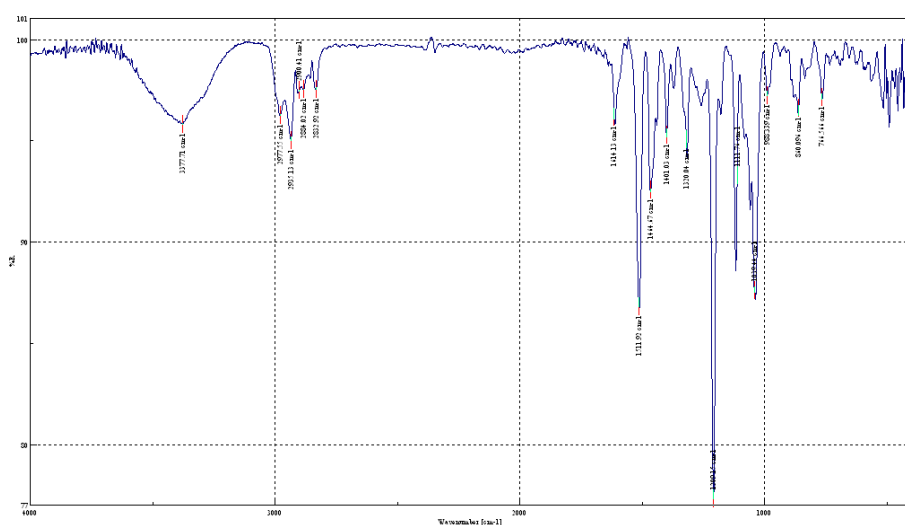

### HR-ESI-MS spectrum of meso-asarolignan A (1).

Monoisotopic Mass, Even Electron Ions  
 228 formula(e) evaluated with 1 results within limits (up to 50 closest results for each mass)  
 Elements Used:  
 C: 0-200 H: 0-1000 O: 0-200 Na: 0-1  
 AT-E2-(5-6)-17  
 20121126-11 109 (0.894) Cm (99:116)

1: TOF MS ES+  
 8.77e+005

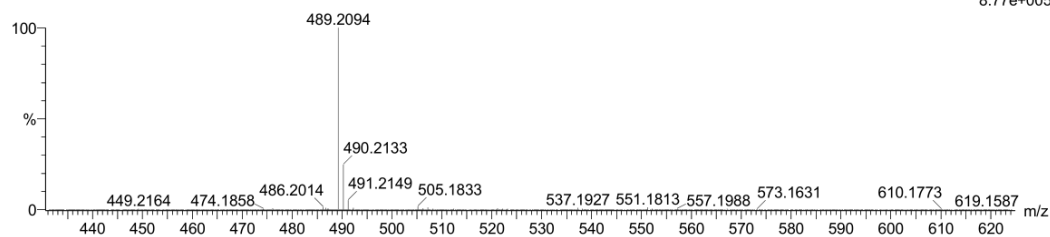

Minimum: -1.5  
 Maximum: 5.0 5.0 50.0

| Mass     | Calc. Mass | mDa  | PPM  | DBE | i-FIT | Norm | Conf(%) | Formula                                           |
|----------|------------|------|------|-----|-------|------|---------|---------------------------------------------------|
| 489.2094 | 489.2101   | -0.7 | -1.4 | 7.5 | 510.4 | n/a  | n/a     | C <sub>24</sub> H <sub>34</sub> O <sub>9</sub> Na |

### The 1D and 2D NMR spectra of meso-asarolignan A (1)

#### <sup>1</sup>H NMR spectrum (AV-400, 400 MHz) of meso-asarolignan A (1) in CD<sub>3</sub>OD

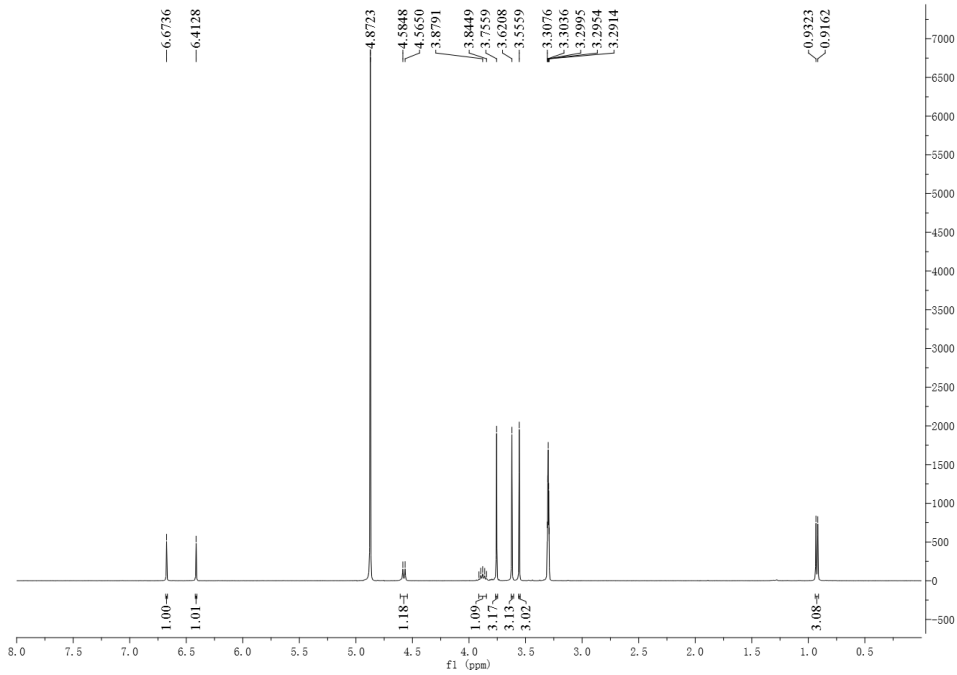

**<sup>13</sup>C NMR spectrum (AV-400, 100 MHz) of *meso*-asarolignan A (1) in CD<sub>3</sub>OD**

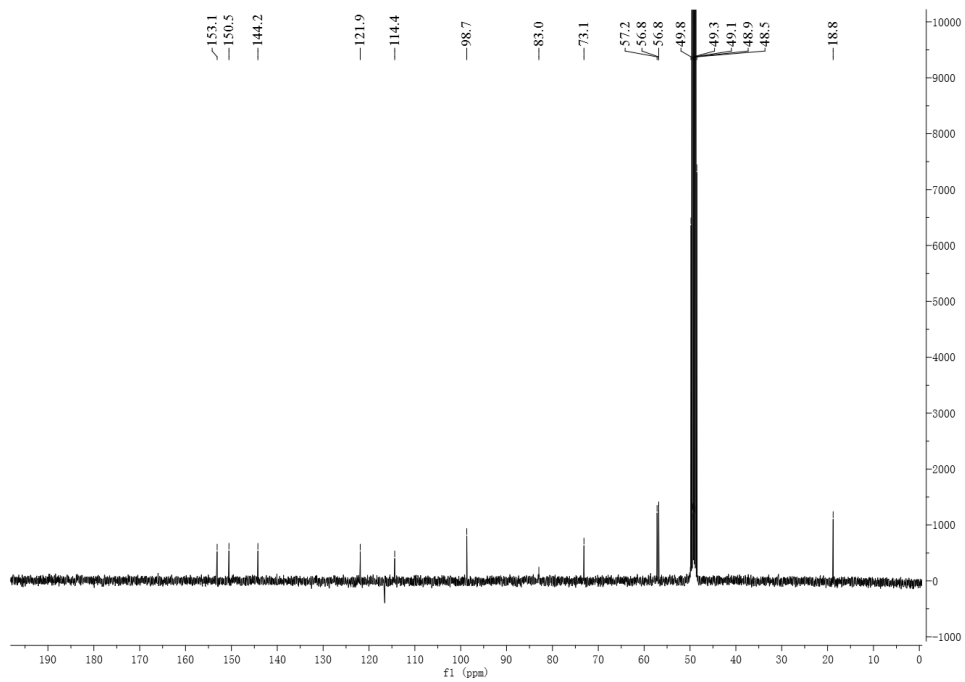

**HSQC spectrum (AV-400) of *meso*-asarolignan A (1) in CD<sub>3</sub>OD**

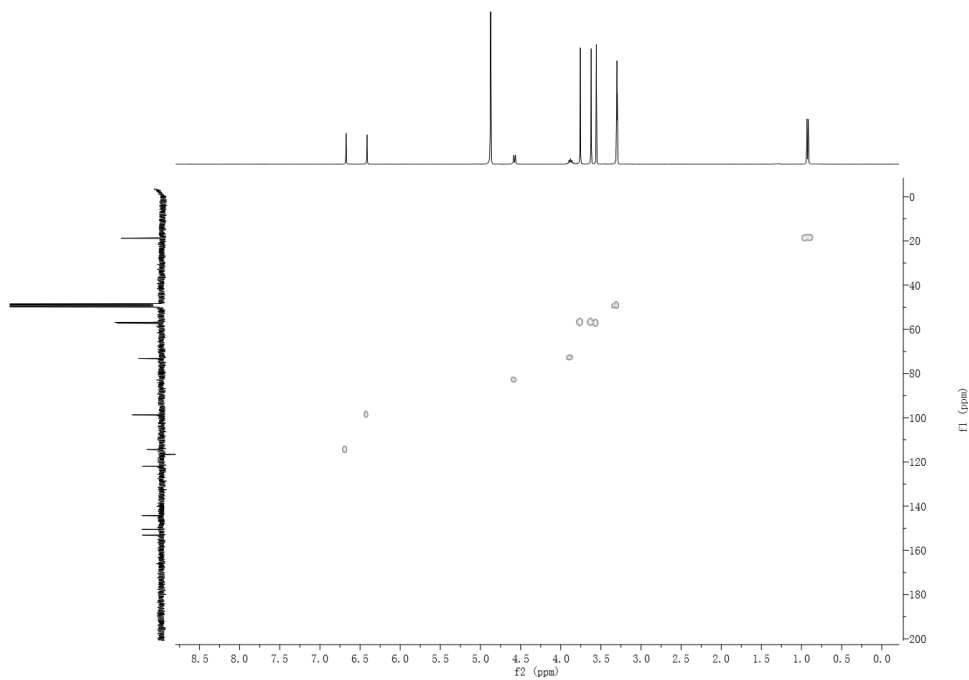

**$^1\text{H}$ - $^1\text{H}$  COSY spectrum (AV-400) of *meso*-asarolignan A (1) in  $\text{CD}_3\text{OD}$**

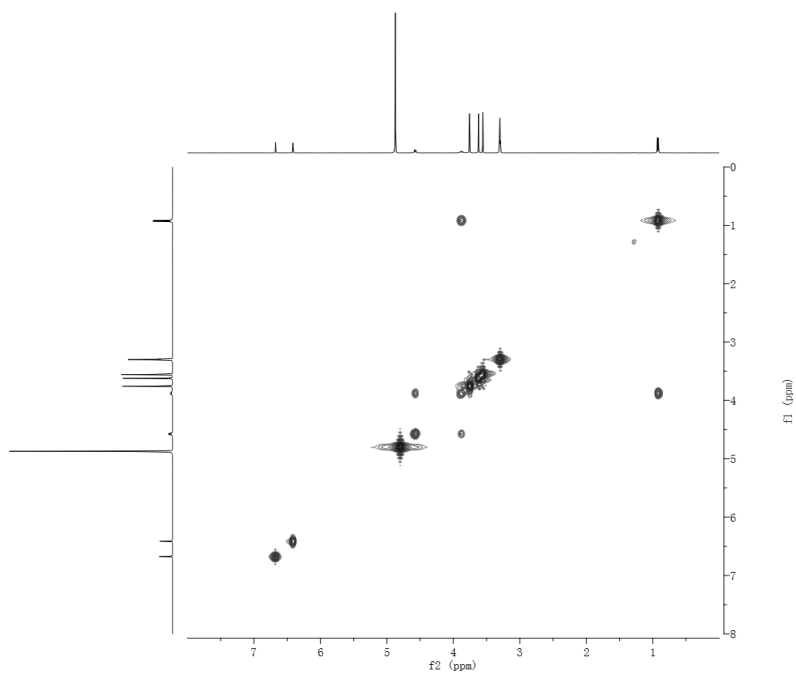

**HMBC spectrum (AV-400) of *meso*-asarolignan A (1) in  $\text{CD}_3\text{OD}$**

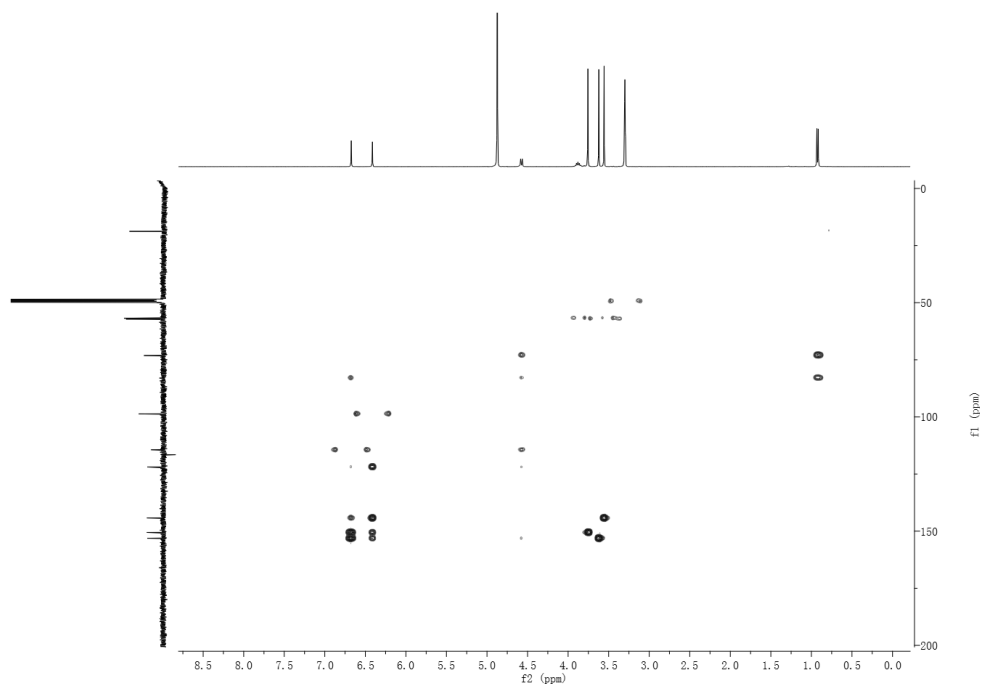

UV spectrum of ( $\pm$ )-asarolignan B (2) in  $\text{CH}_3\text{OH}$ .

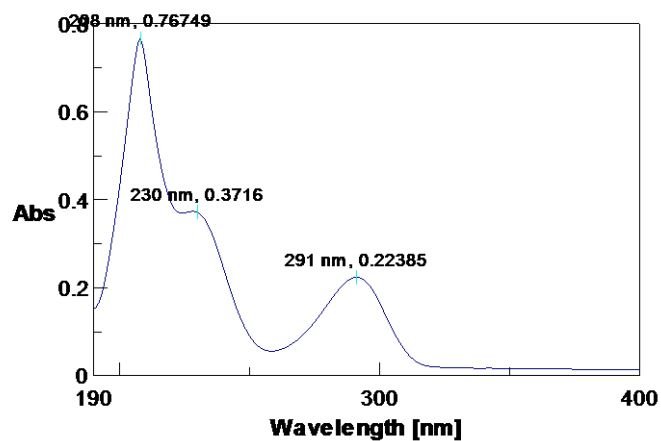

IR (KBr disc) spectrum of ( $\pm$ )-asarolignan B (2).

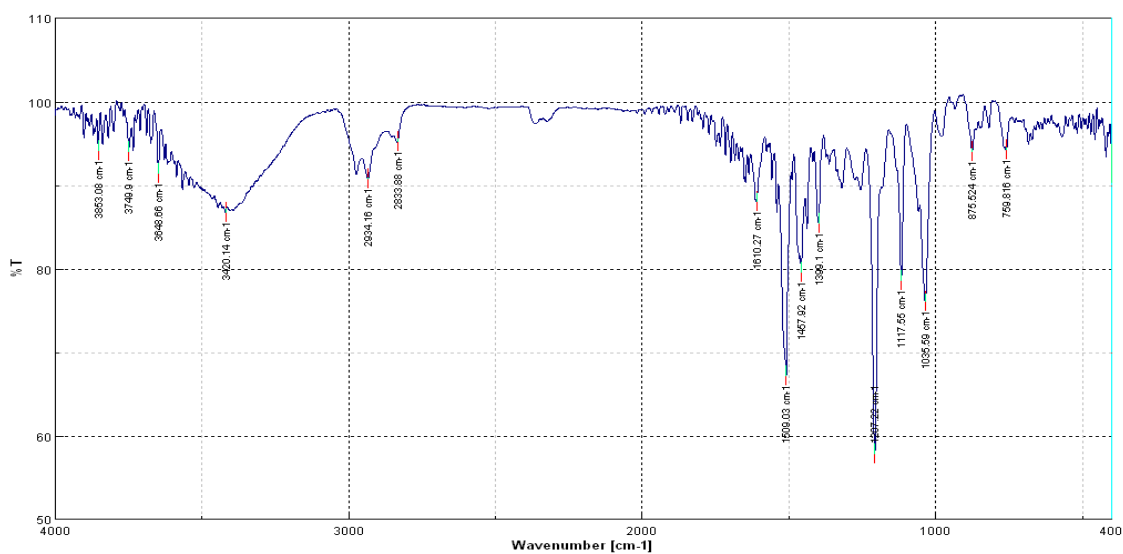

## HR-ESI-MS spectrum of ( $\pm$ )-asarolignan B (2).

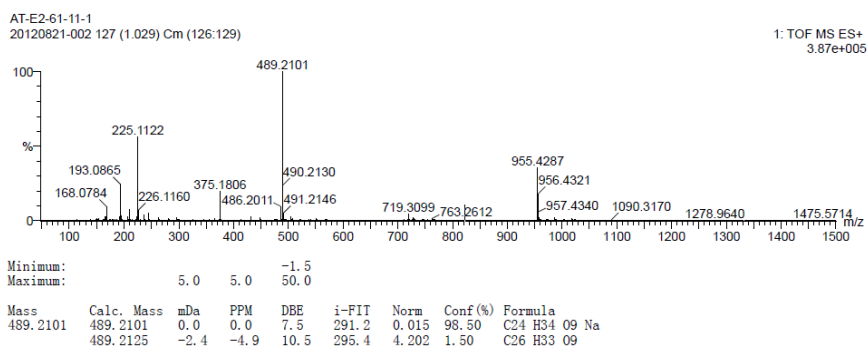

## The 1D and 2D NMR spectra of ( $\pm$ )-asarolignan B (2)

### $^1\text{H}$ NMR spectrum (AV-400, 400 MHz) of ( $\pm$ )-asarolignan B (2) in $\text{CD}_3\text{OD}$

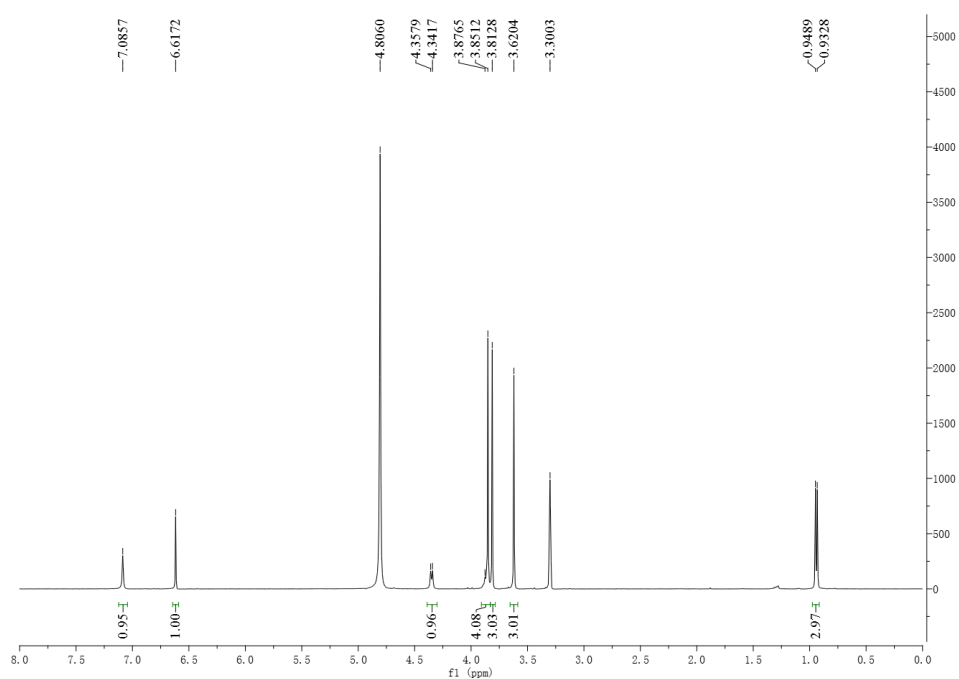

### $^{13}\text{C}$ NMR spectrum (AV-400, 100 MHz) of ( $\pm$ )-asarolignan B (2) in $\text{CD}_3\text{OD}$

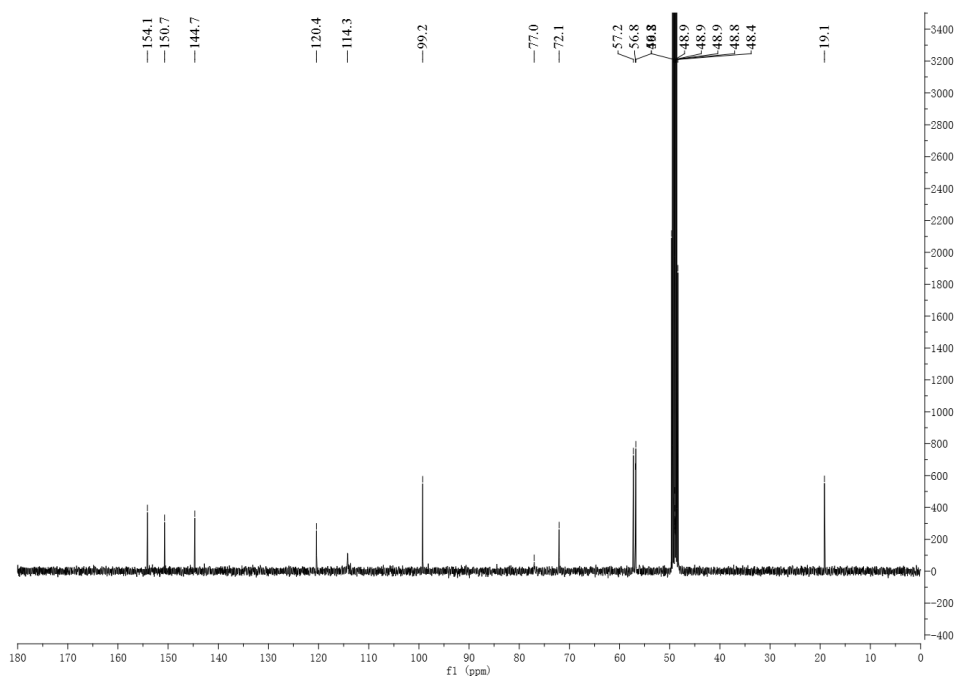

**HSQC spectrum (AV-400) of (±)-asarolignan B (2) in CD<sub>3</sub>OD**

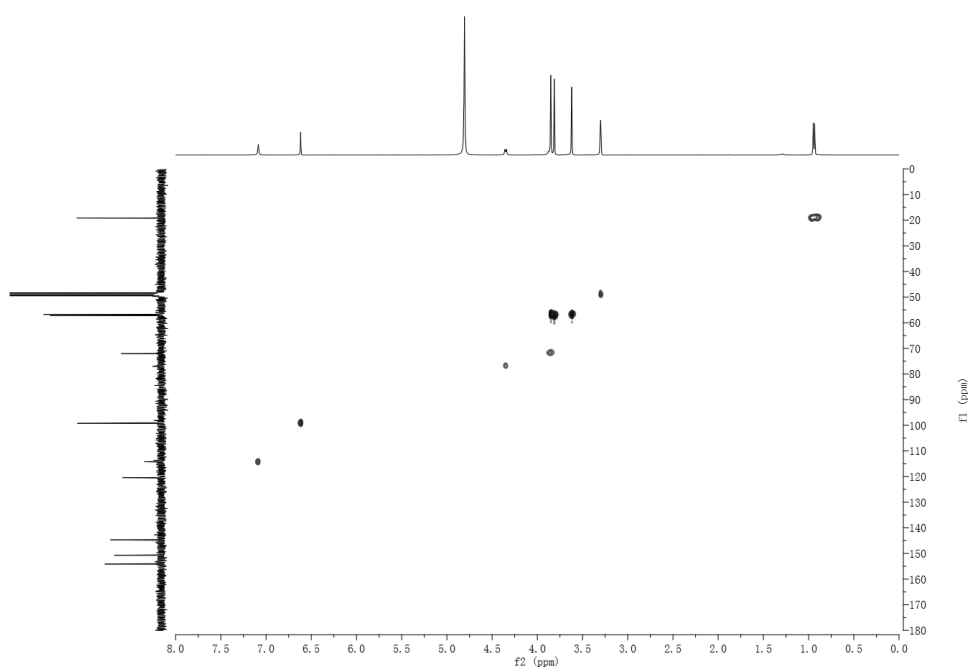

**HMBC spectrum(AV-400) of (±)-asarolignan B (2) in CD<sub>3</sub>OD**

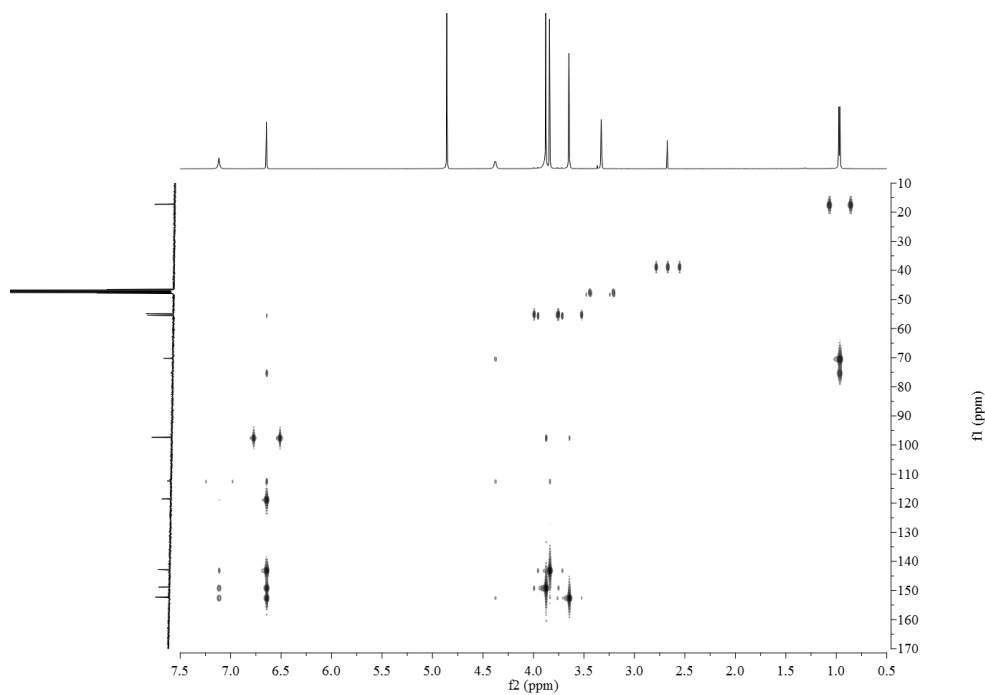

UV spectrum of ( $\pm$ )-asarolignan C (3) in CH<sub>3</sub>OH

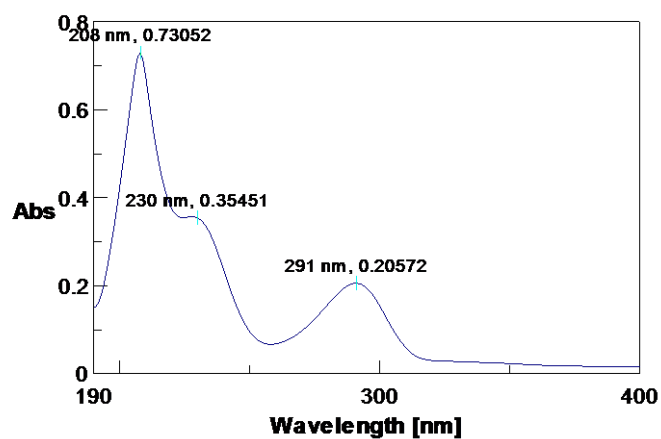

IR (KBr disc) spectrum of ( $\pm$ )-asarolignan C (3).

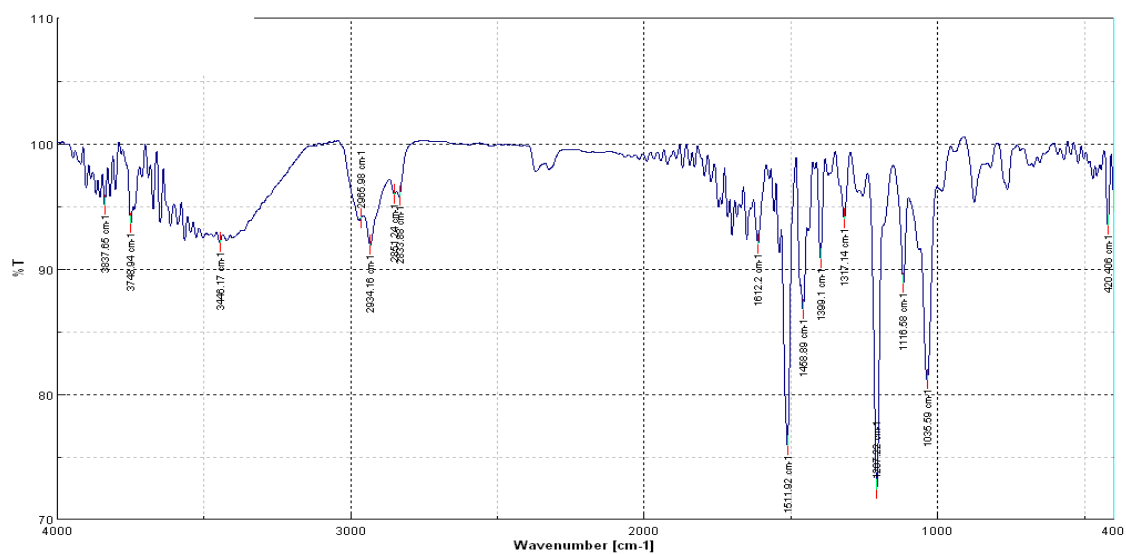



## HR-ESI-MS spectrum of ( $\pm$ )-asarolignan C (3).

AT-E2-61-10

20120707-13 125 (1.014) Cm (125)

1: TOF MS ES+  
1.01e+005

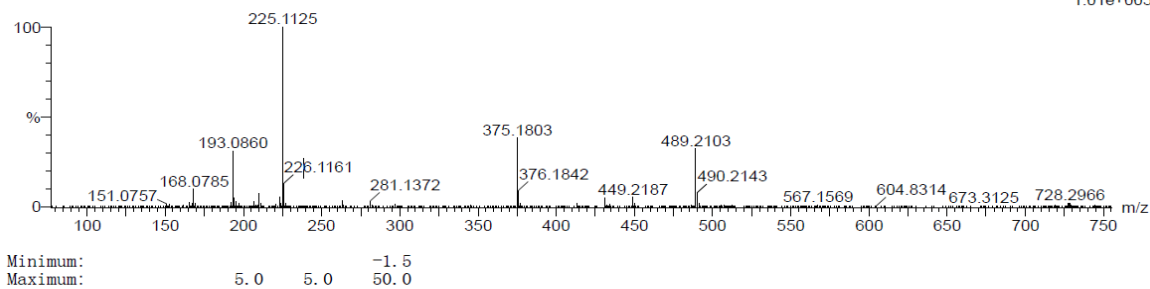

| Mass     | Calc. Mass | mDa  | PPM  | DBE  | i-FIT | Norm  | Conf (%) | Formula                                           |
|----------|------------|------|------|------|-------|-------|----------|---------------------------------------------------|
| 489.2103 | 489.2101   | 0.2  | 0.4  | 7.5  | 41.9  | 0.054 | 94.74    | C <sub>24</sub> H <sub>34</sub> O <sub>9</sub> Na |
| 489.2125 | 489.2125   | -2.2 | -4.5 | 10.5 | 44.8  | 2.946 | 5.26     | C <sub>26</sub> H <sub>33</sub> O <sub>9</sub>    |

## The 1D and 2D NMR spectra of ( $\pm$ )-asarolignan C (3)

### $^1\text{H}$ NMR spectrum (AV-400, 400 MHz) of ( $\pm$ )-asarolignan C (3) in $\text{CD}_3\text{OD}$

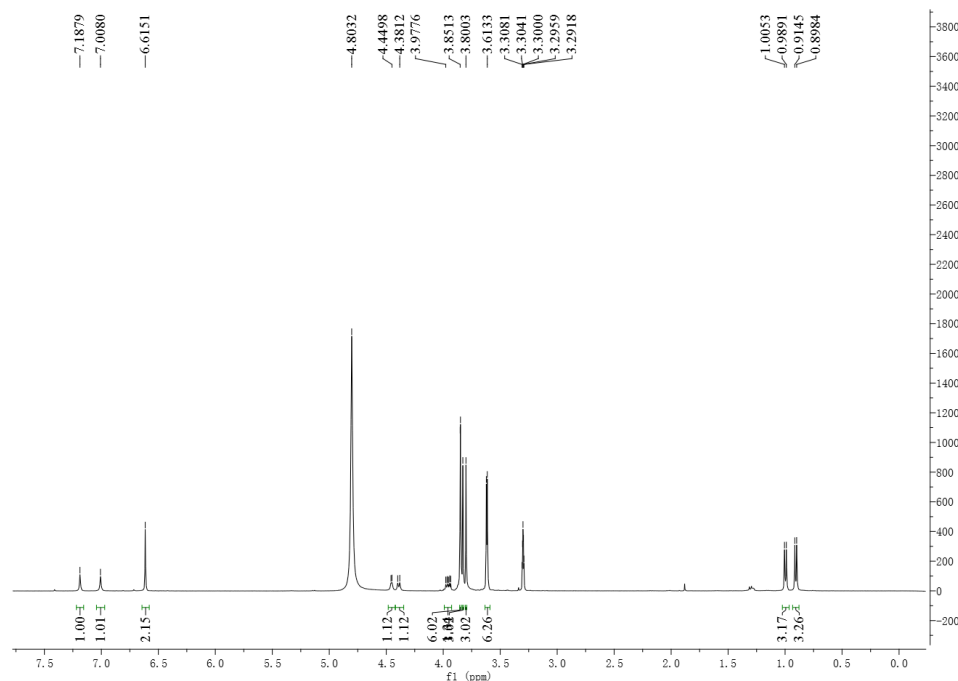

### $^{13}\text{C}$ NMR spectrum (AV-400, 400 MHz) of ( $\pm$ )-asarolignan C (3) in $\text{CD}_3\text{OD}$

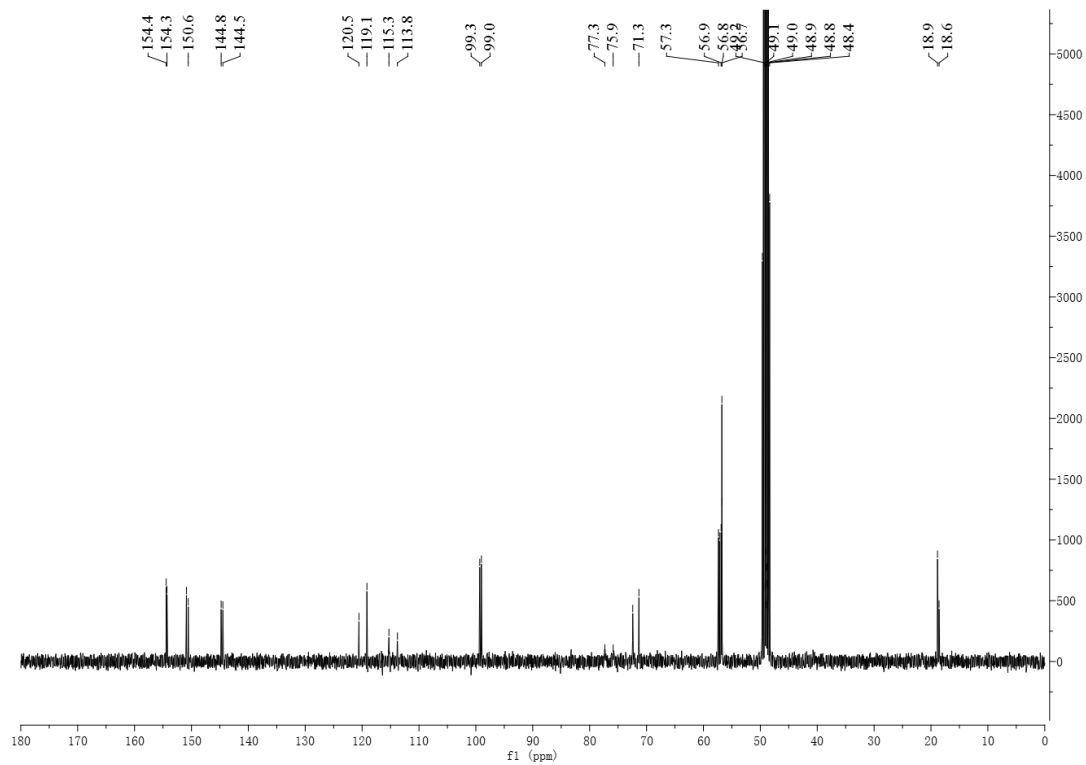

**HSQC spectrum (AV-400) of (±)-asarolignan C (3) in CD<sub>3</sub>OD**

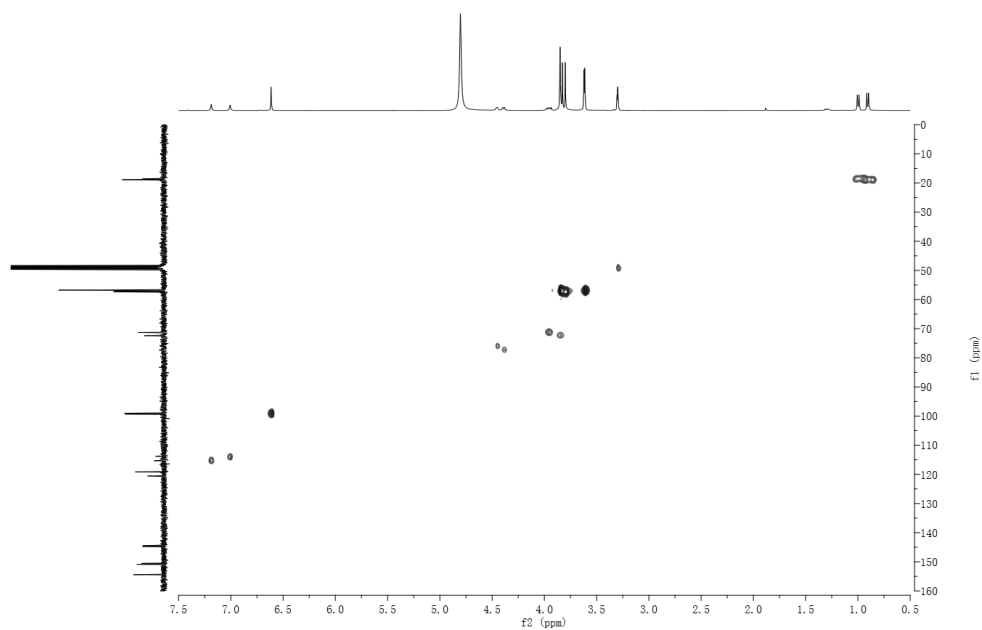

**<sup>1</sup>H-<sup>1</sup>H COSY spectrum (AV-400) of (±)-asarolignan C (3) in CD<sub>3</sub>OD**

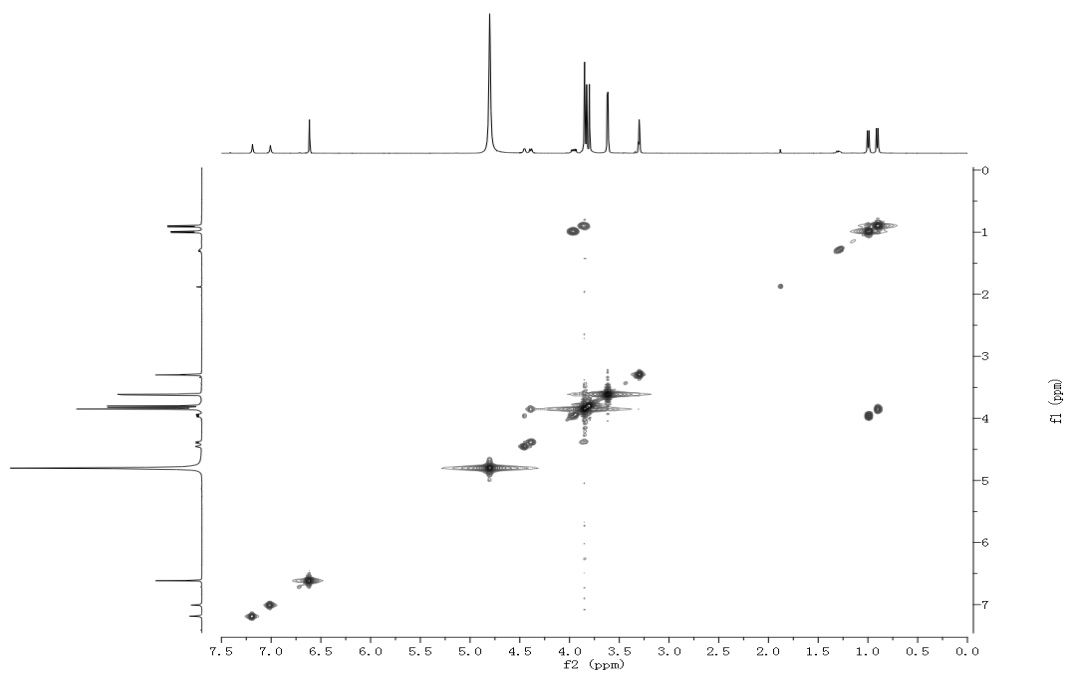

**HMBC spectrum (AV-400) of (±)-asarolignan C (3) in CD<sub>3</sub>OD**

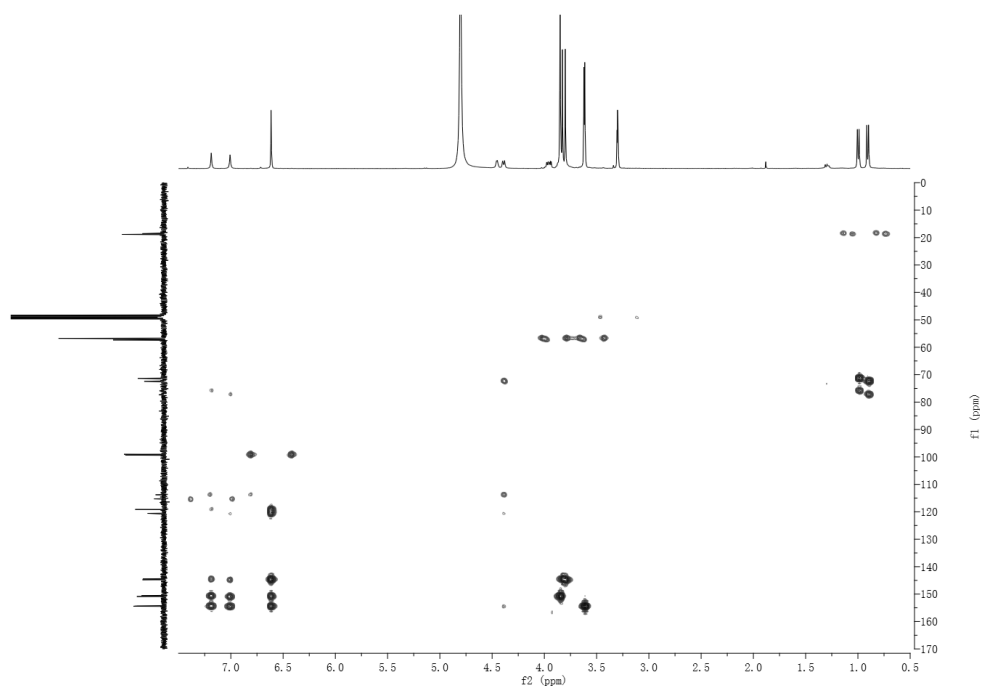

**UV spectrum of (±)-asarolignan D (4) in CH<sub>3</sub>OH**

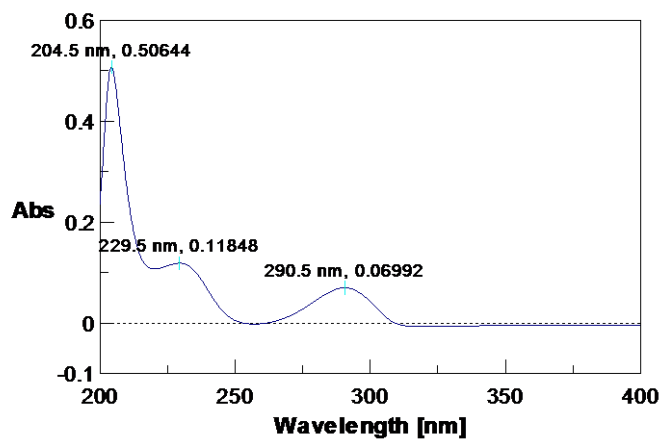

IR (KBr disc) spectrum of (±)-asarolignan D (4)

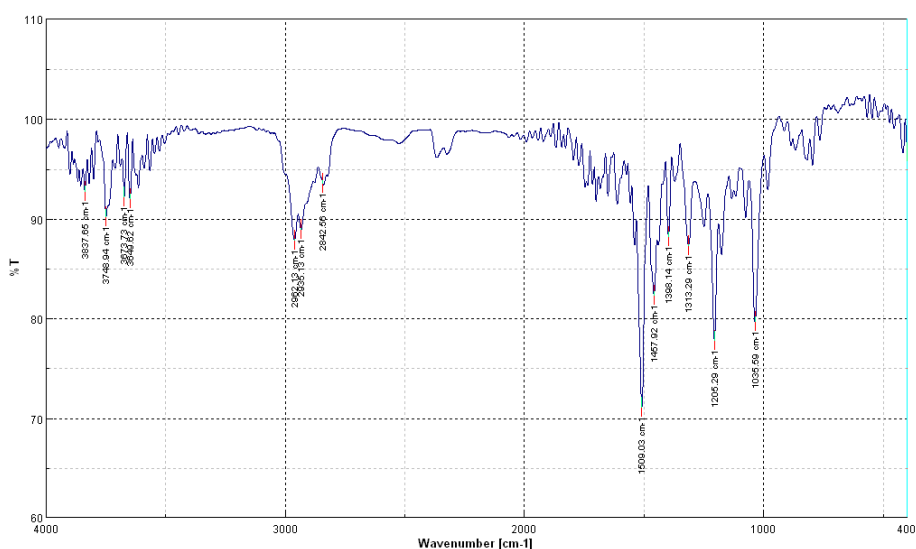

HR-ESI-MS spectrum of (±)-asarolignan D (4)

AT-E5H3-3  
20130315-09 217 (1.758) Cm (207:222)

1: TOF MS ES+  
1.14e+006

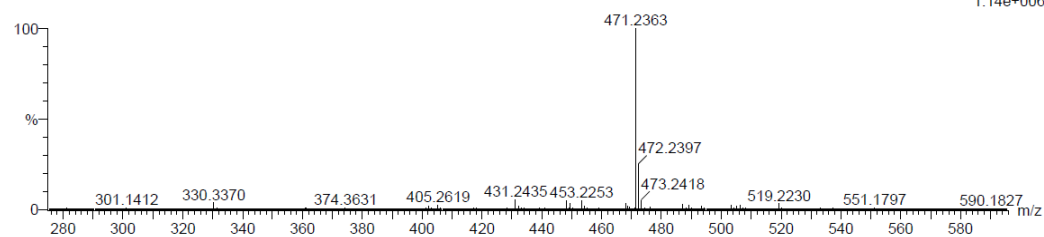

Minimum: -1.5  
Maximum: 5.0 10.0 50.0

| Mass     | Calc. Mass | mDa  | PPM  | DBE  | i-FIT | Norm  | Conf (%) | Formula       |
|----------|------------|------|------|------|-------|-------|----------|---------------|
| 471.2363 | 471.2359   | 0.4  | 0.8  | 7.5  | 570.6 | 0.040 | 96.04    | C25 H36 O7 Na |
| 471.2383 | 471.2383   | -2.0 | -4.2 | 10.5 | 573.7 | 3.235 | 3.94     | C27 H35 O7    |
| 471.2324 | 471.2324   | 3.9  | 8.3  | 19.5 | 578.8 | 8.247 | 0.03     | C34 H31 O2    |

## The 1D and 2D NMR spectra of (±)-asarolignan D (4)

<sup>1</sup>H NMR spectrum (AV-600, 600 MHz) of (±)-asarolignan D (4) in acetone-d<sub>6</sub>

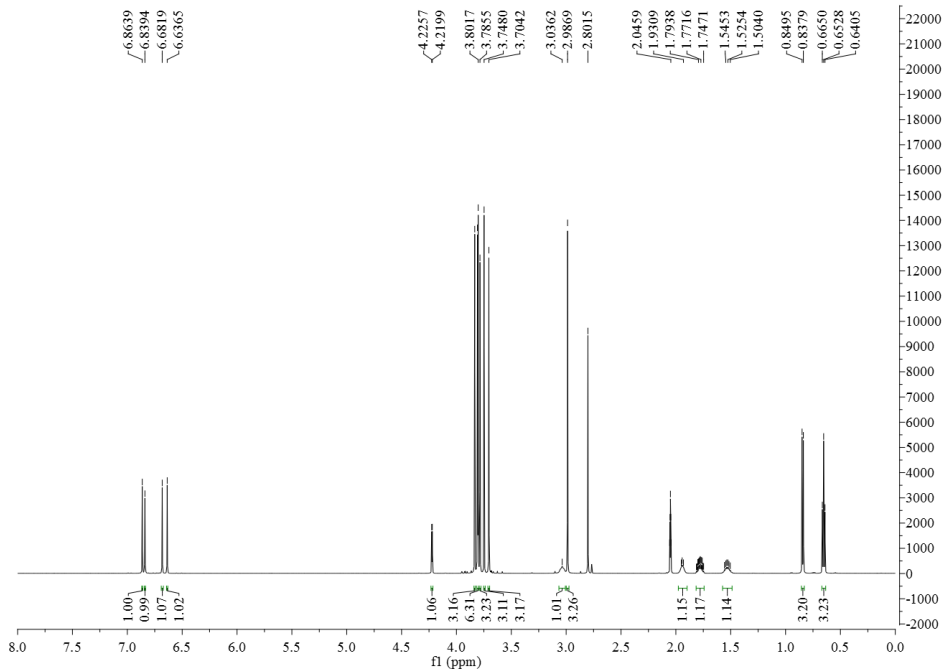

**<sup>13</sup>C NMR spectrum (AV-600, 150 MHz) of (±)-asarolignan D (4) in acetone-*d*<sub>6</sub>**

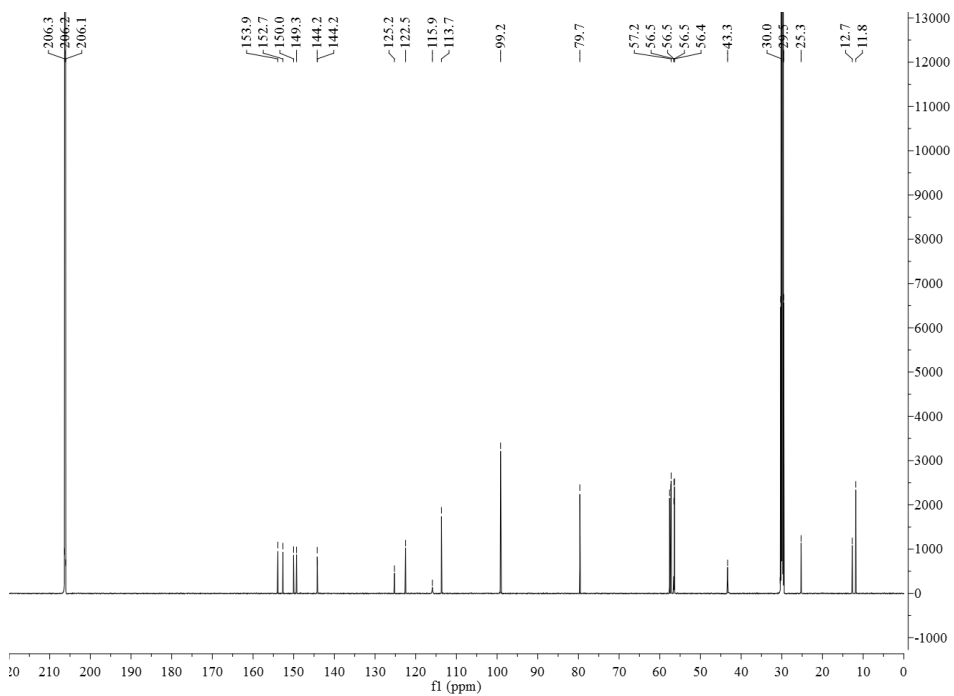

**HSQC spectrum (AV-600) of (±)-asarolignan D (4) in acetone-*d*<sub>6</sub>**

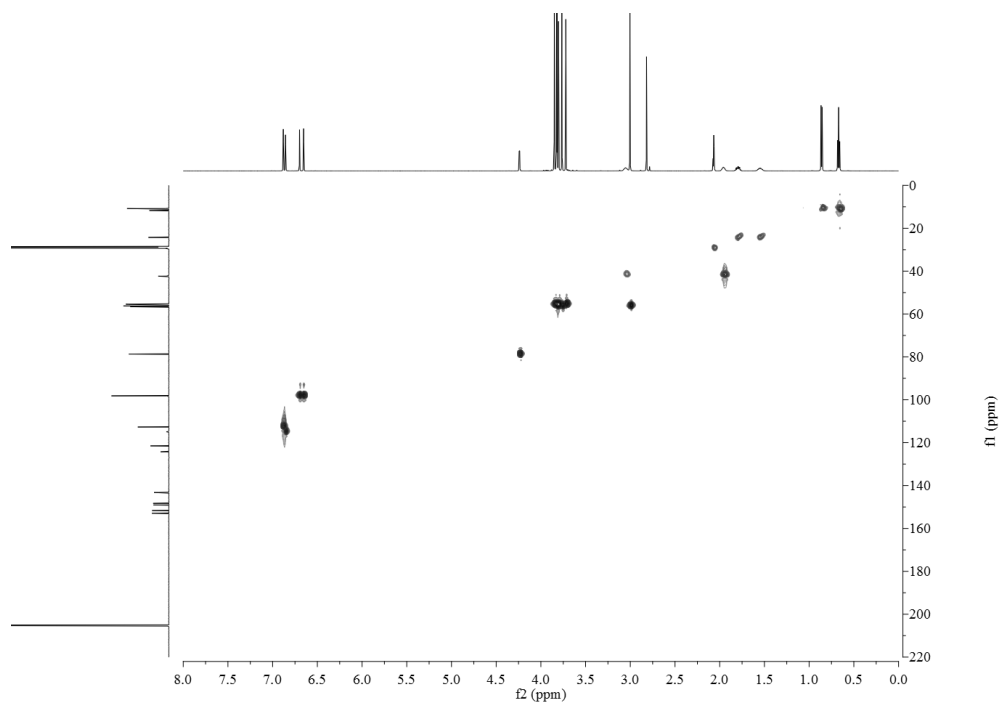

**$^1\text{H}$ - $^1\text{H}$  COSY spectrum (AV-600) of ( $\pm$ )-asarolignan D (4) in acetone- $d_6$**

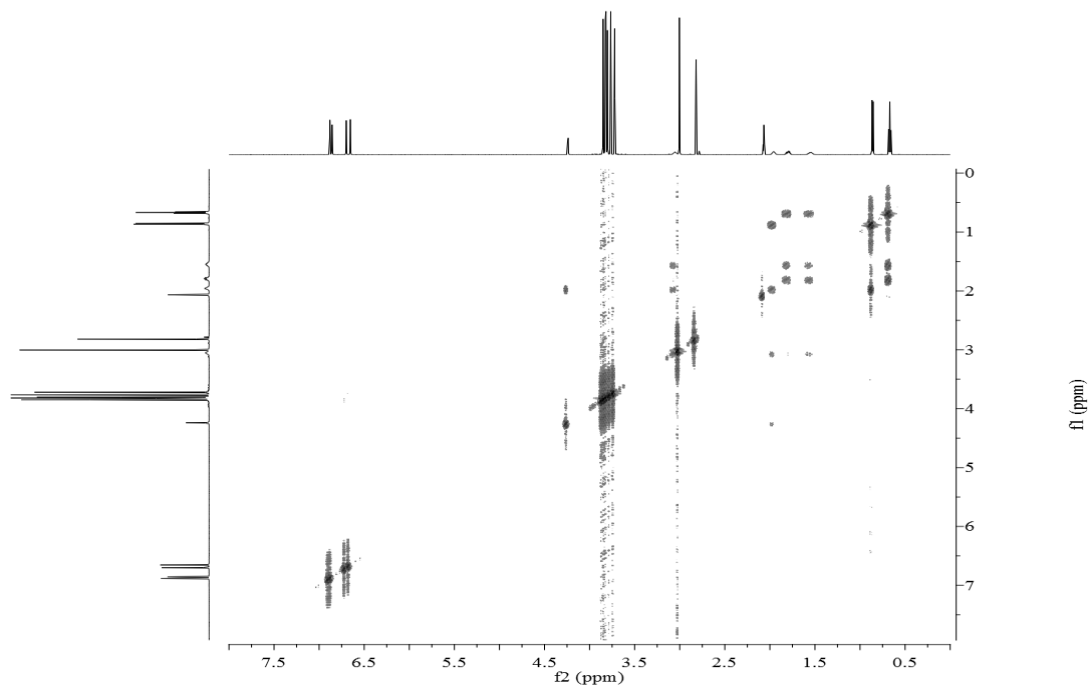

**HMBC spectrum (AV-600) of ( $\pm$ )-asarolignan D (4) in acetone- $d_6$**

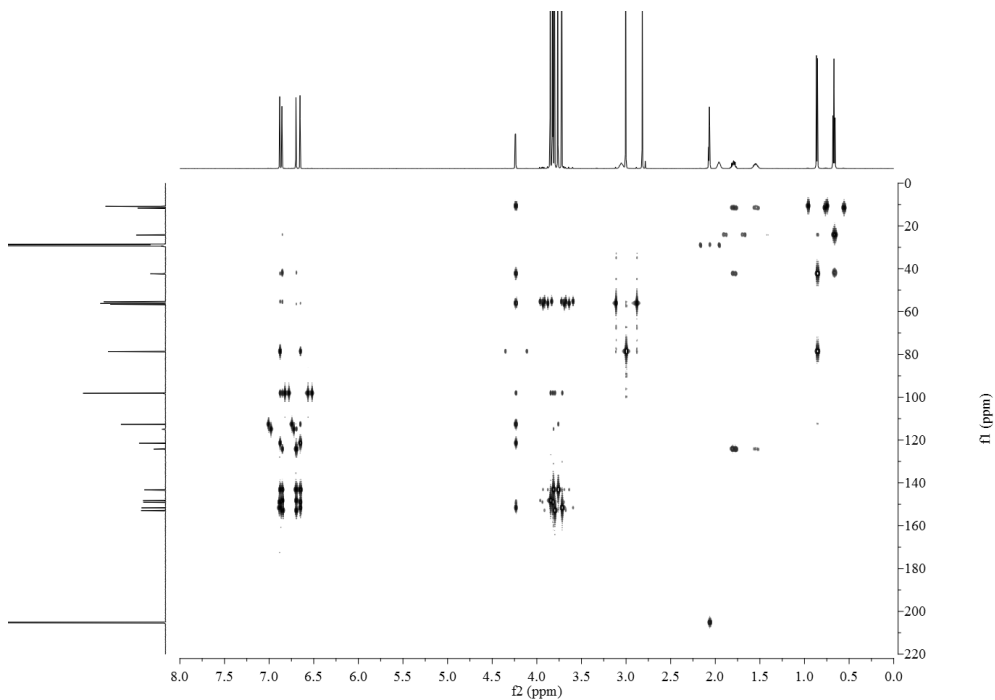

UV spectrum of ( $\pm$ )-asarolignan E (5) in  $\text{CH}_3\text{OH}$

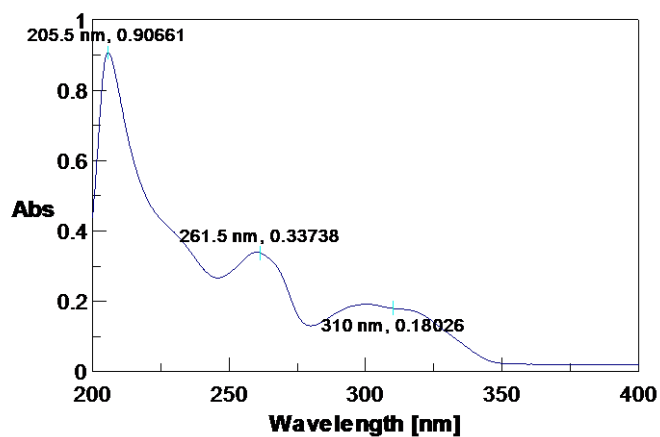

IR (KBr disc) spectrum of ( $\pm$ )-asarolignan E (5)

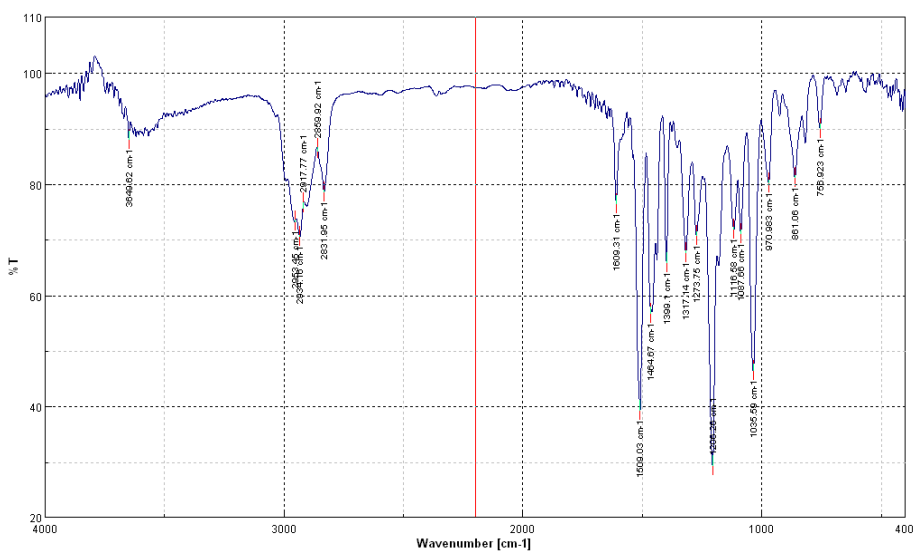

## HR-ESI-MS spectrum of (±)-asarolignan E (5)

AT-E5H4-1  
20130315-14 212 (1.709) Cm (199:224)

1: TOF MS ES+  
1.10e+006

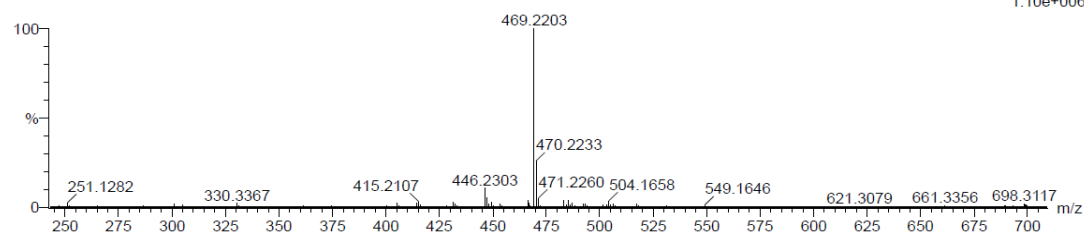

Minimum: -1.5  
Maximum: 50.0

| Mass     | Calc. Mass | mDa  | PPM  | DBE  | i-FIT | Norm  | Conf (%) | Formula       |
|----------|------------|------|------|------|-------|-------|----------|---------------|
| 469.2203 | 469.2202   | 0.1  | 0.2  | 8.5  | 550.5 | 0.018 | 98.25    | C25 H34 O7 Na |
|          | 469.2226   | -2.3 | -4.9 | 11.5 | 554.5 | 4.056 | 1.73     | C27 H33 O7    |
|          | 469.2168   | 3.5  | 7.5  | 20.5 | 559.1 | 8.627 | 0.02     | C34 H29 O2    |

## The 1D and 2D NMR spectra of (±)-asarolignan E (5)

### <sup>1</sup>H NMR spectrum (AV-400, 400 MHz) of (±)-asarolignan E (5) in CD<sub>3</sub>OD

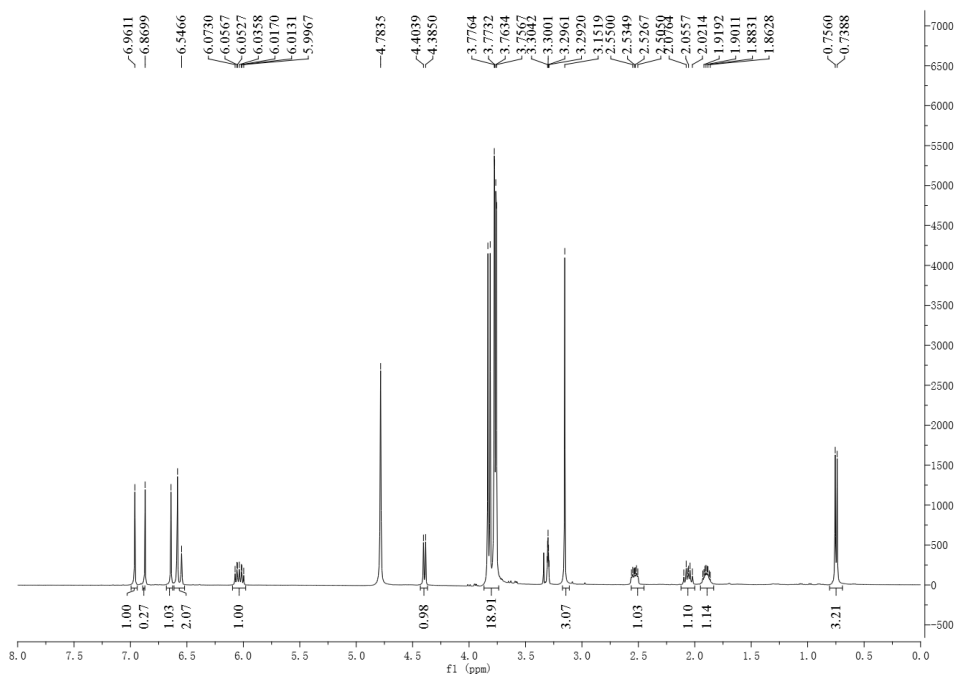

### <sup>13</sup>C NMR spectrum (AV-400, 100 MHz) of (±)-asarolignan E (5) in CD<sub>3</sub>OD



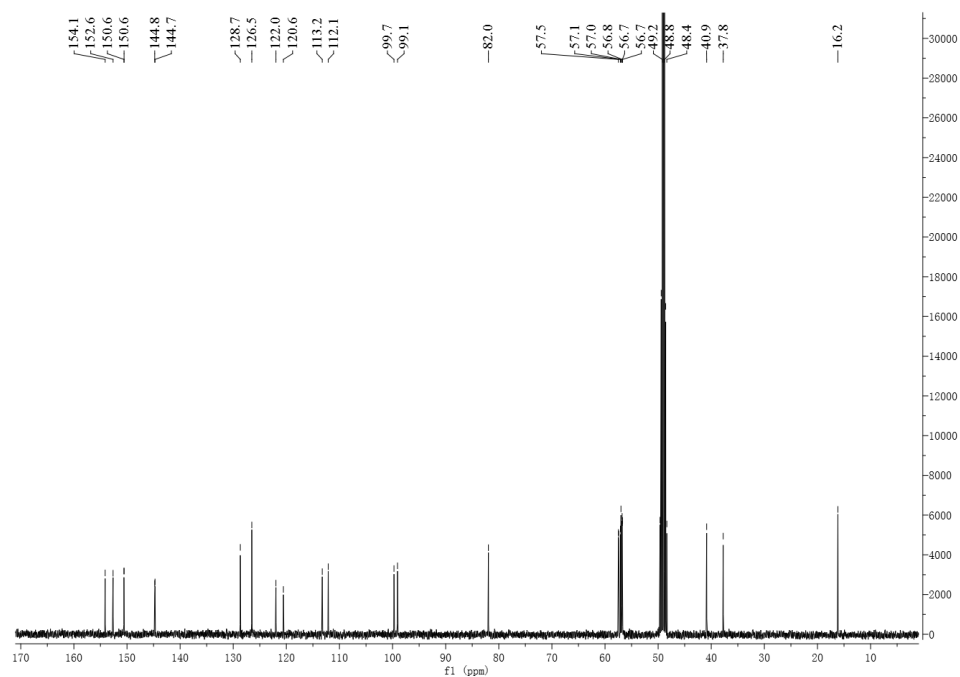

**HSQC spectrum (AV-400) of (±)-asarolignan E (5) in CD<sub>3</sub>OD**

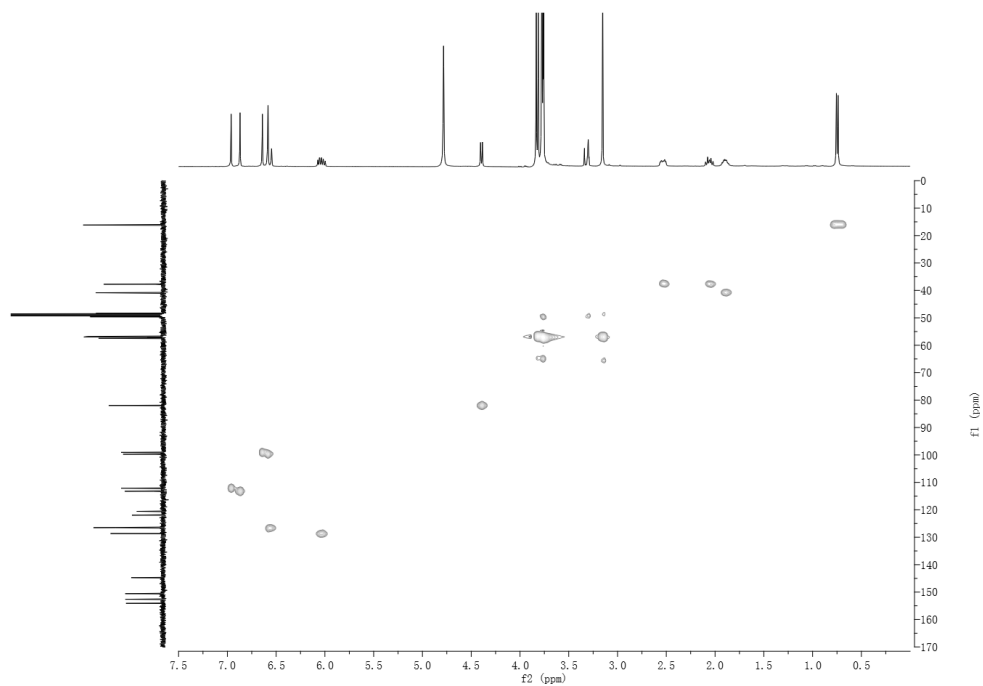

**<sup>1</sup>H-<sup>1</sup>H COSY spectrum (AV-400) of (±)-asarolignan E (5) in CD<sub>3</sub>OD**

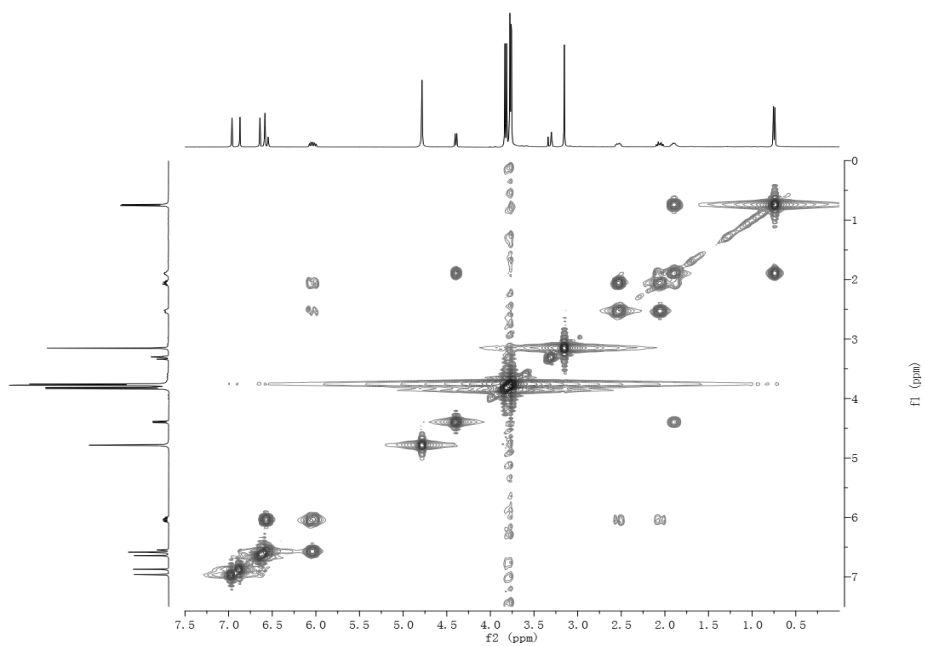

**HMBC spectrum (AV-400) of (±)-asarolignan E (5) in CD<sub>3</sub>OD**

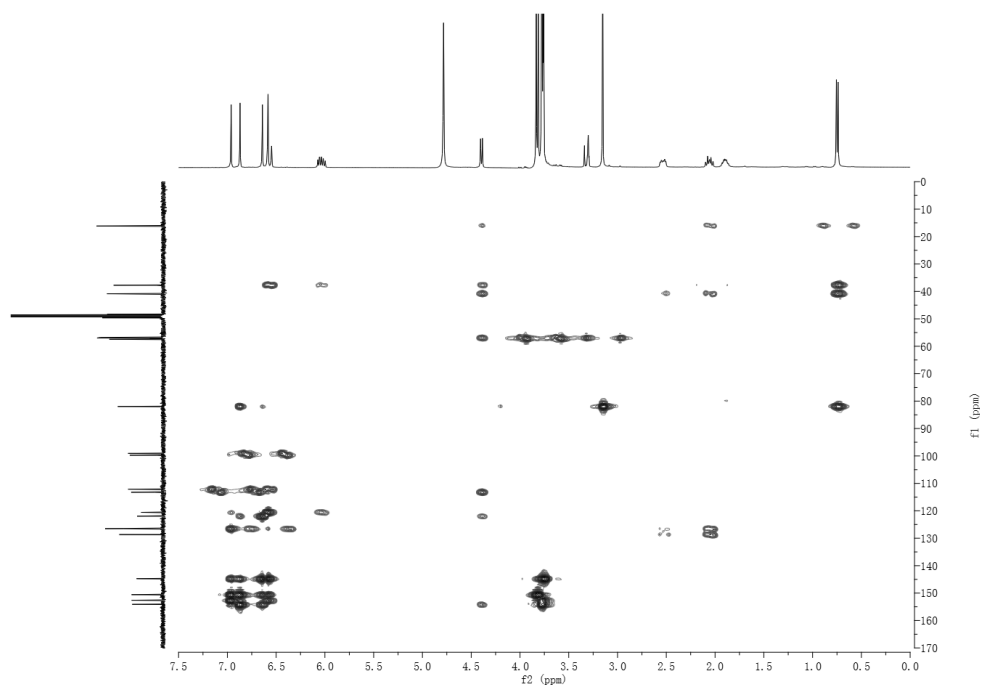

**UV spectrum of (±)-asarolignan F (6) in CH<sub>3</sub>OH**

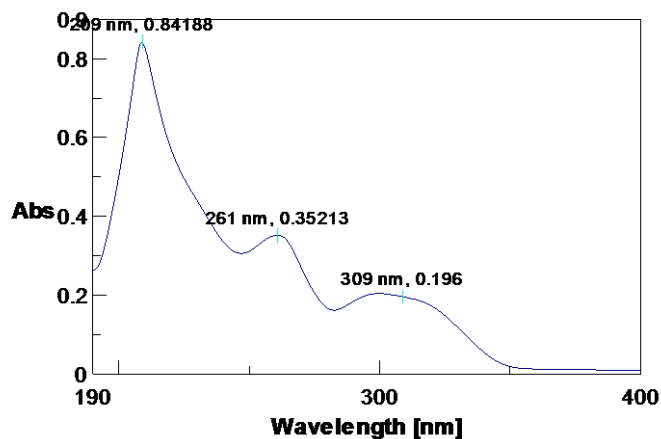

IR (KBr disc) spectrum of (±)-asarolignan F (6)

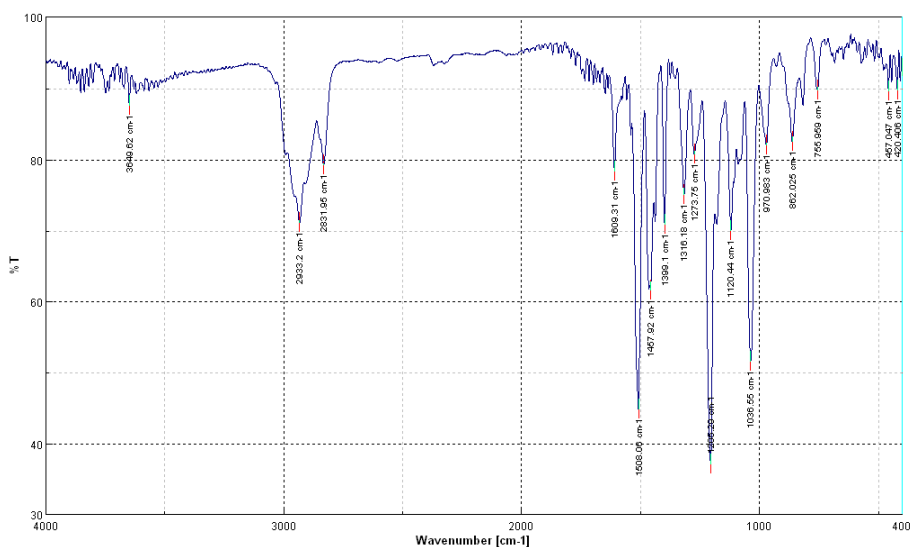

HR-ESI-MS spectrum of (±)-asarolignan F (6)

X-E-14-2

20120304-7 221 (1.788) Cm (218:223)

1: TOF MS ES+  
2.78e+006

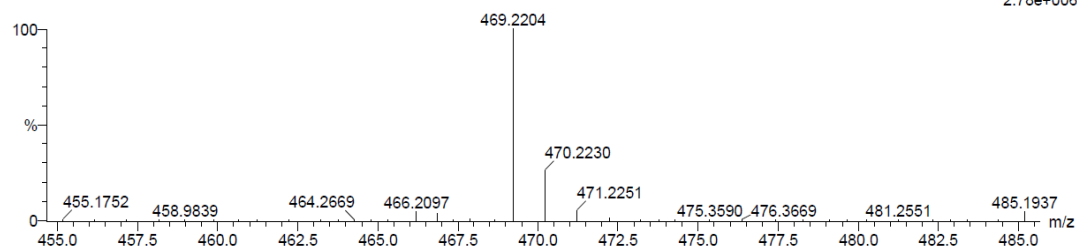

Minimum:  
Maximum:

5.0 10.0 -1.5  
50.0

| Mass     | Calc. Mass | mDa  | PPM  | DBE  | i-FIT | Norm  | Conf (%) | Formula       |
|----------|------------|------|------|------|-------|-------|----------|---------------|
| 469.2204 | 469.2202   | 0.2  | 0.4  | 8.5  | 26.5  | 0.015 | 98.51    | C25 H34 O7 Na |
|          | 469.2226   | -2.2 | -4.7 | 11.5 | 30.7  | 4.216 | 1.48     | C27 H33 O7    |
|          | 469.2168   | 3.6  | 7.7  | 20.5 | 35.3  | 8.802 | 0.02     | C34 H29 O2    |

The 1D and 2D NMR spectra of (±)-asarolignan F (6)

<sup>1</sup>H NMR spectrum (AV-300, 300 MHz) of (±)-asarolignan F (6) in CD<sub>3</sub>OD

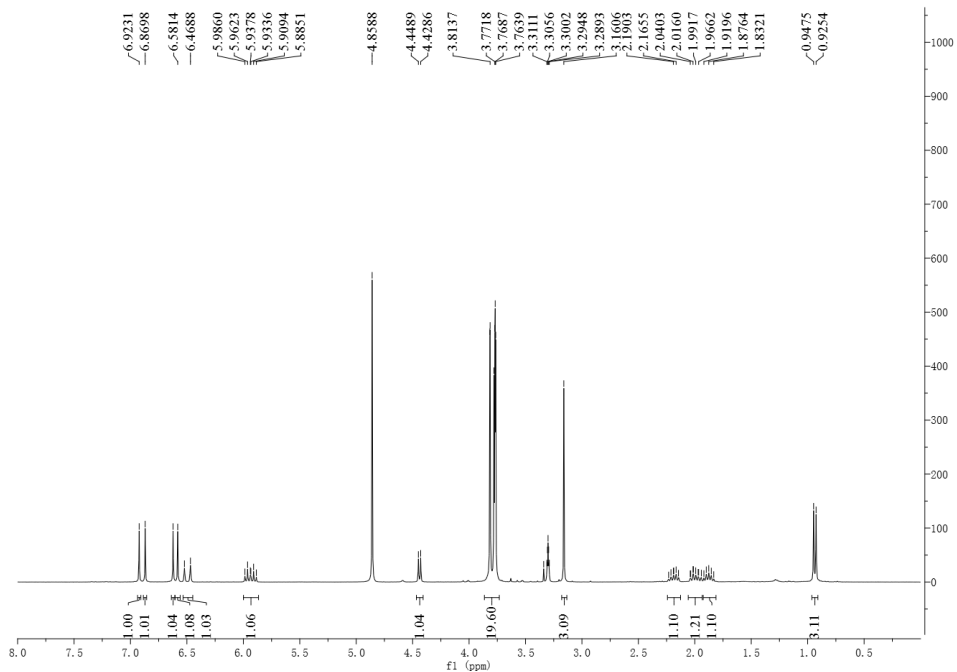

**$^{13}\text{C}$  NMR spectrum (AV-300, 75 MHz) of ( $\pm$ )-asarolignan F (6) in  $\text{CD}_3\text{OD}$**

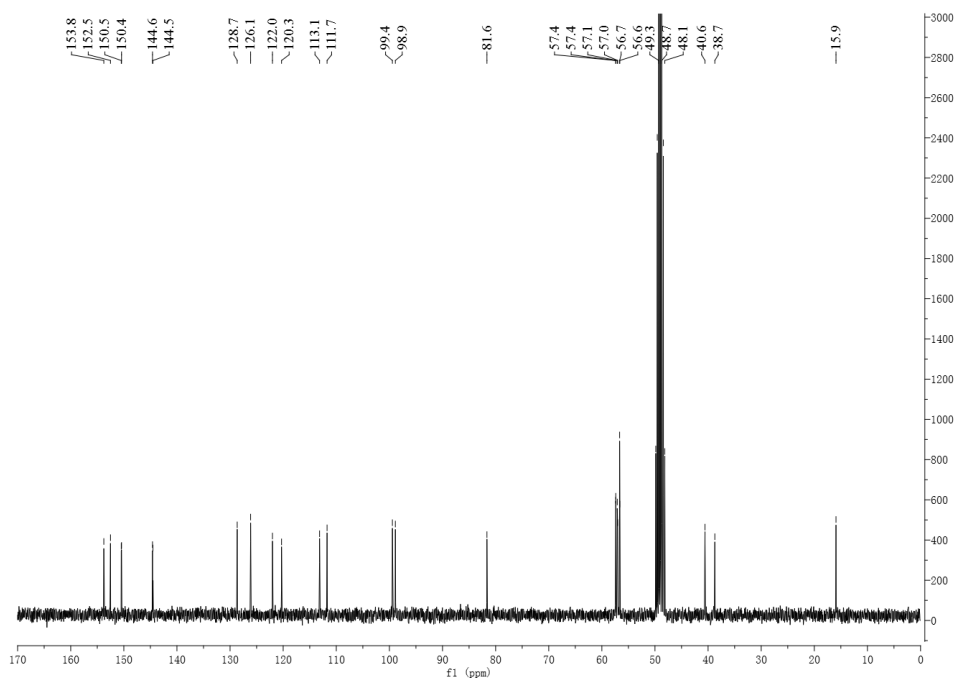

**HSQC spectrum (AV-300) of ( $\pm$ )-asarolignan F (6) in  $\text{CD}_3\text{OD}$**

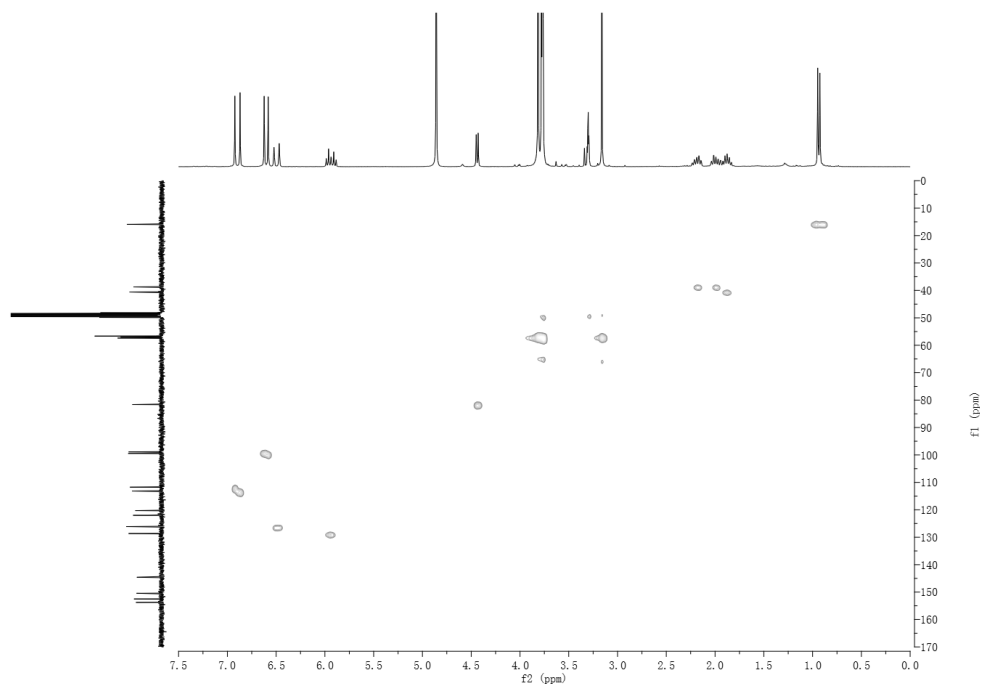

**$^1\text{H}$ - $^1\text{H}$  COSY spectrum (AV-300) of ( $\pm$ )-asarolignan F (6) in  $\text{CD}_3\text{OD}$**

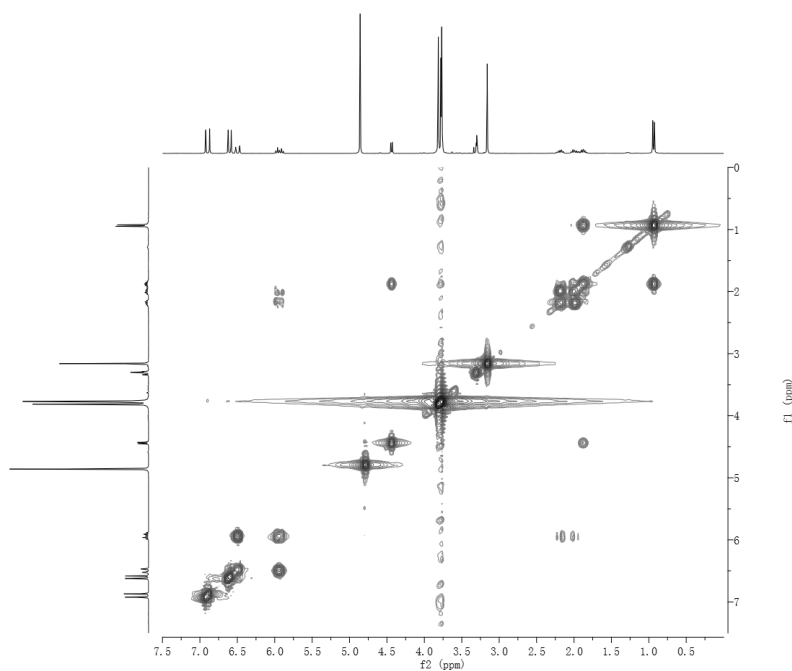

**HMBC spectrum (AV-300) of ( $\pm$ )-asarolignan F (6) in  $\text{CD}_3\text{OD}$**

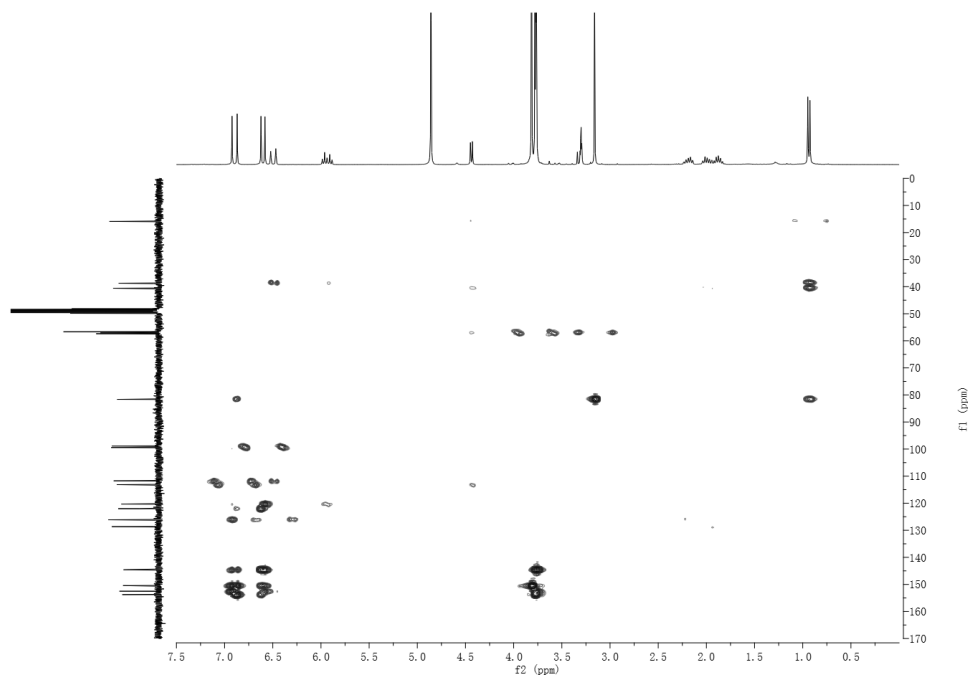

UV spectrum of ( $\pm$ )-asarolignan G (7) in CH<sub>3</sub>OH

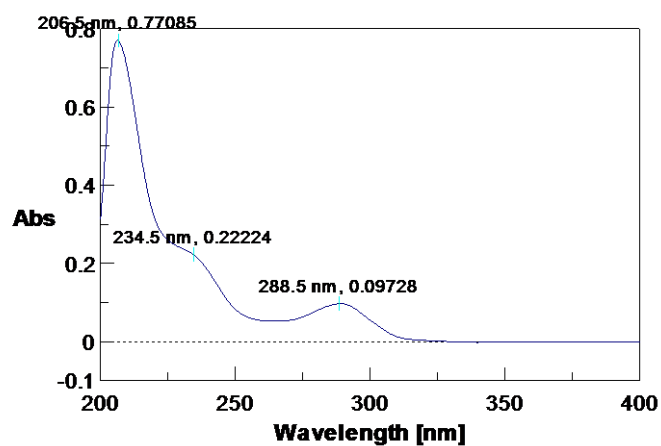

IR (KBr disc) spectrum of ( $\pm$ )-asarolignan G (7)

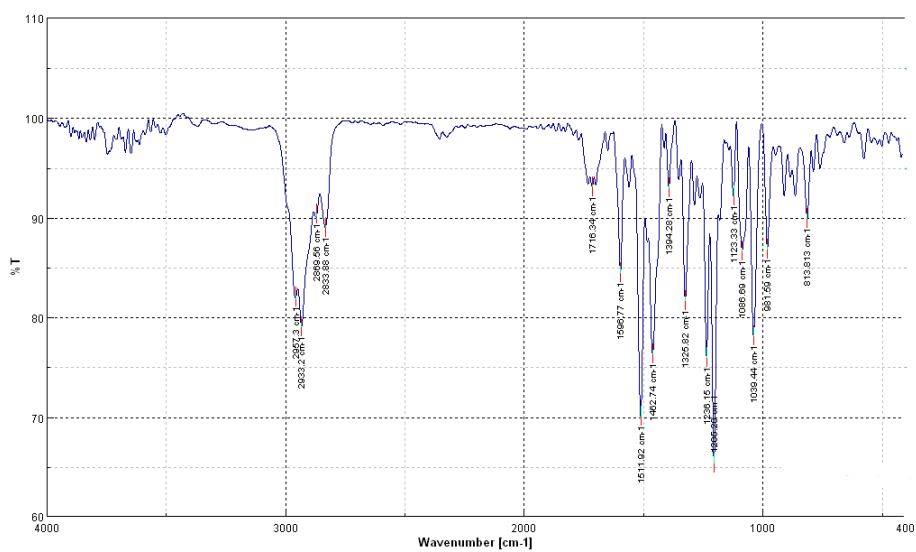

## HR-ESI-MS spectrum of ( $\pm$ )-asarolignan G (7)

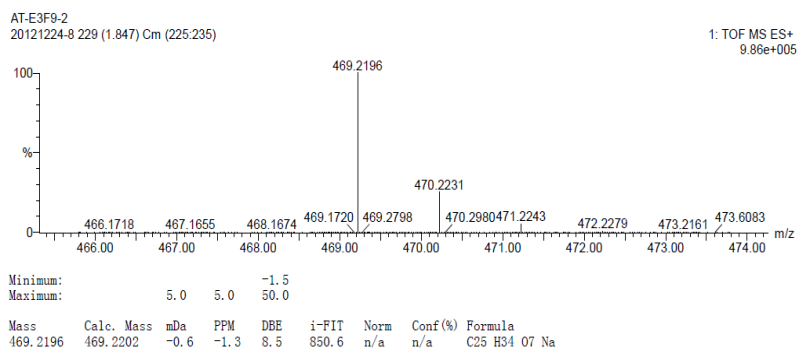

## The 1D and 2D NMR spectra of ( $\pm$ )-asarolignan G (7)

### <sup>1</sup>H NMR spectrum (AV-400, 400 MHz) of ( $\pm$ )-asarolignan G (7) in CD<sub>3</sub>OD

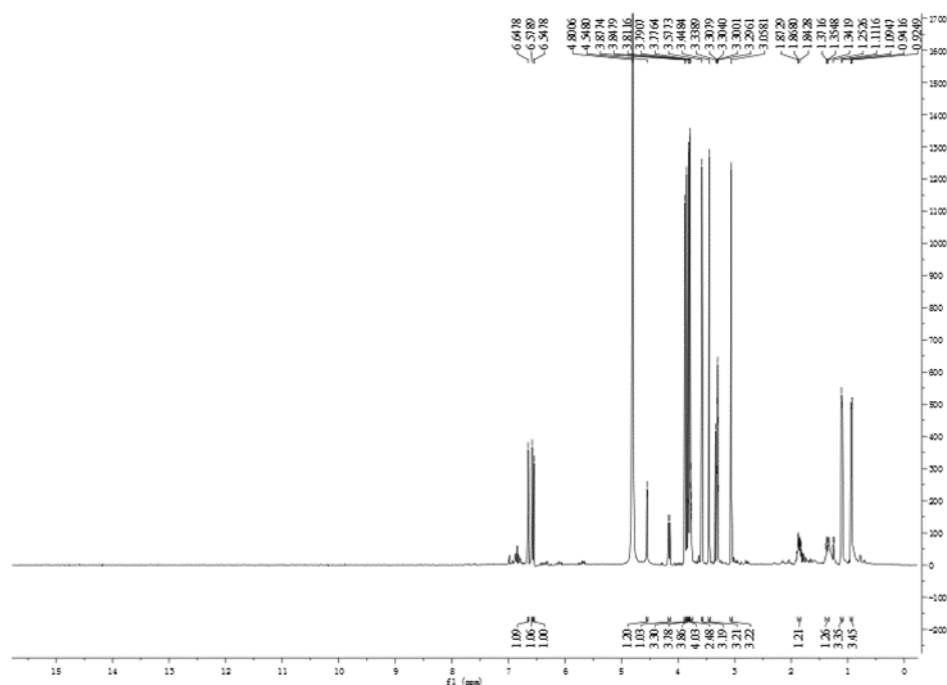

### <sup>13</sup>C NMR spectrum (AV-400, 100 MHz) of ( $\pm$ )-asarolignan G (7) in CD<sub>3</sub>OD

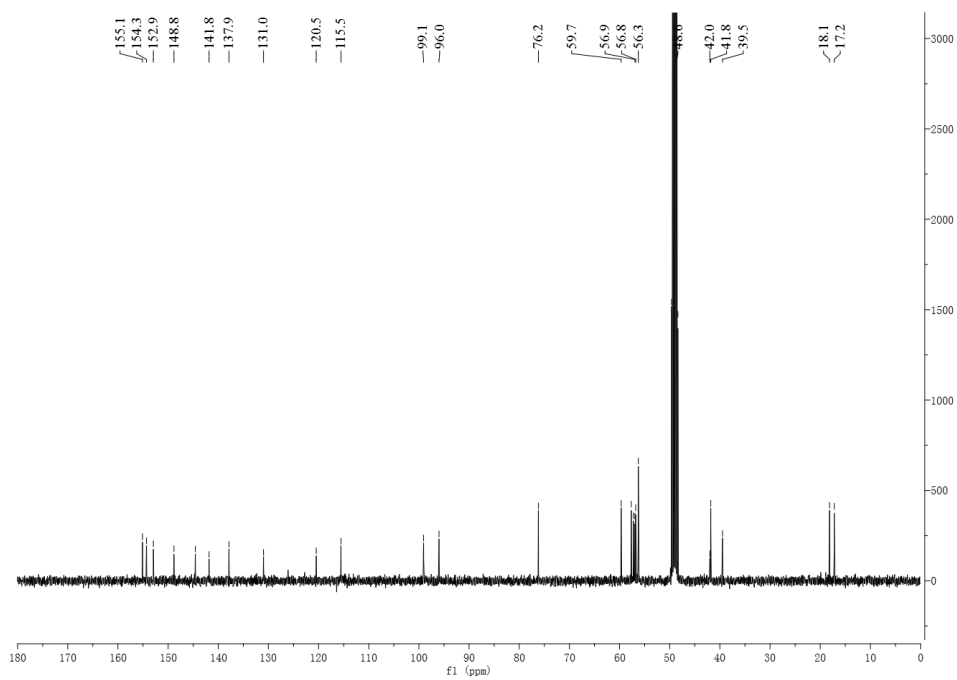

**$^1\text{H}$ - $^1\text{H}$  COSY spectrum (AV-400) of ( $\pm$ )-asarolignan G (7) in  $\text{CD}_3\text{OD}$**

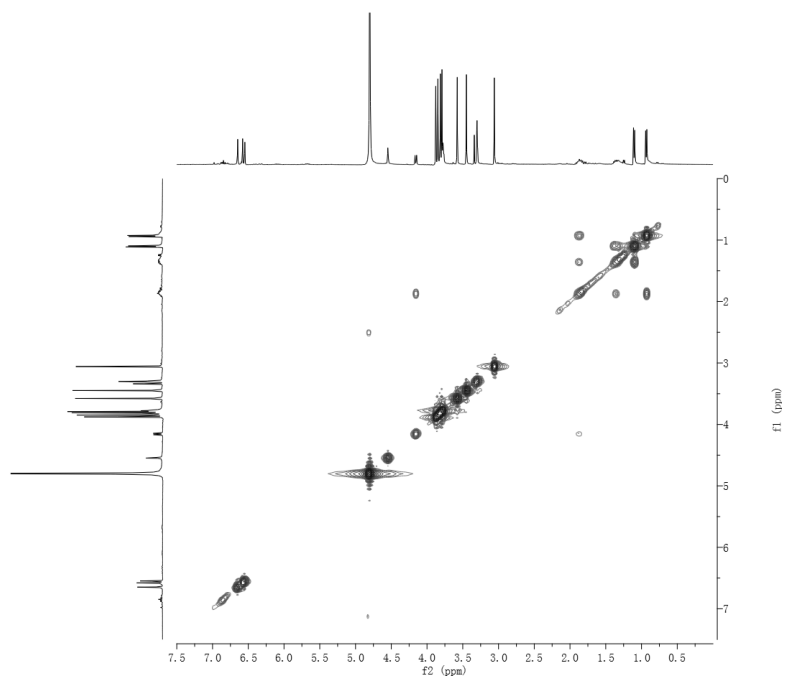

**HSQC spectrum (AV-400) of ( $\pm$ )-asarolignan G (7) in  $\text{CD}_3\text{OD}$**



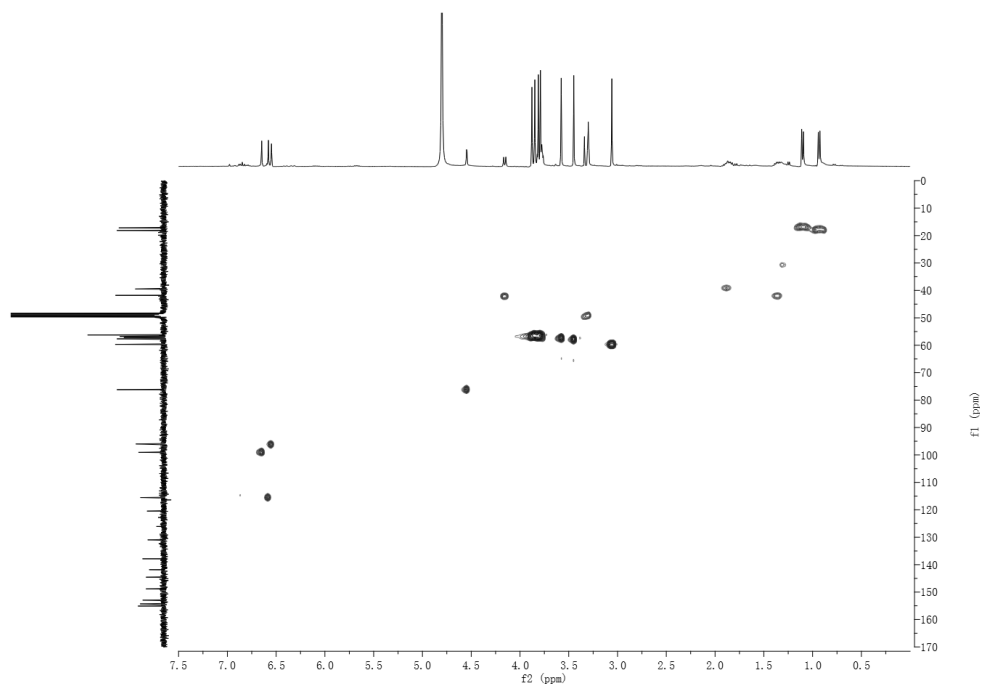

**HMBC spectrum (AV-400) of (±)-asarolignan G (7) in CD<sub>3</sub>OD**

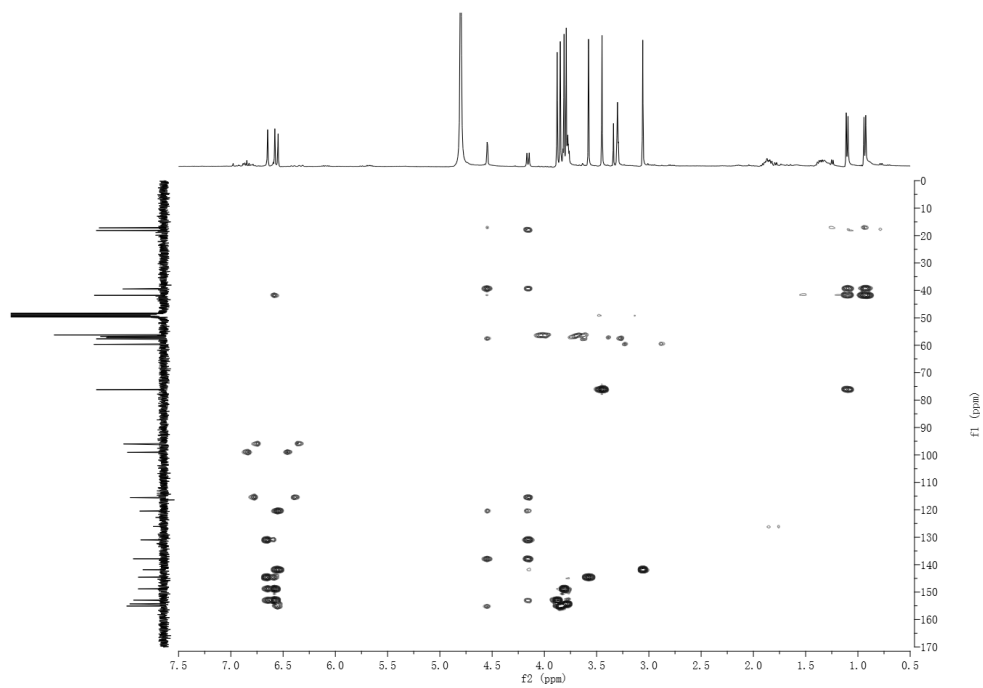

**NOESY spectrum (AV-400) of (±)-asarolignan G (7) in CD<sub>3</sub>OD**

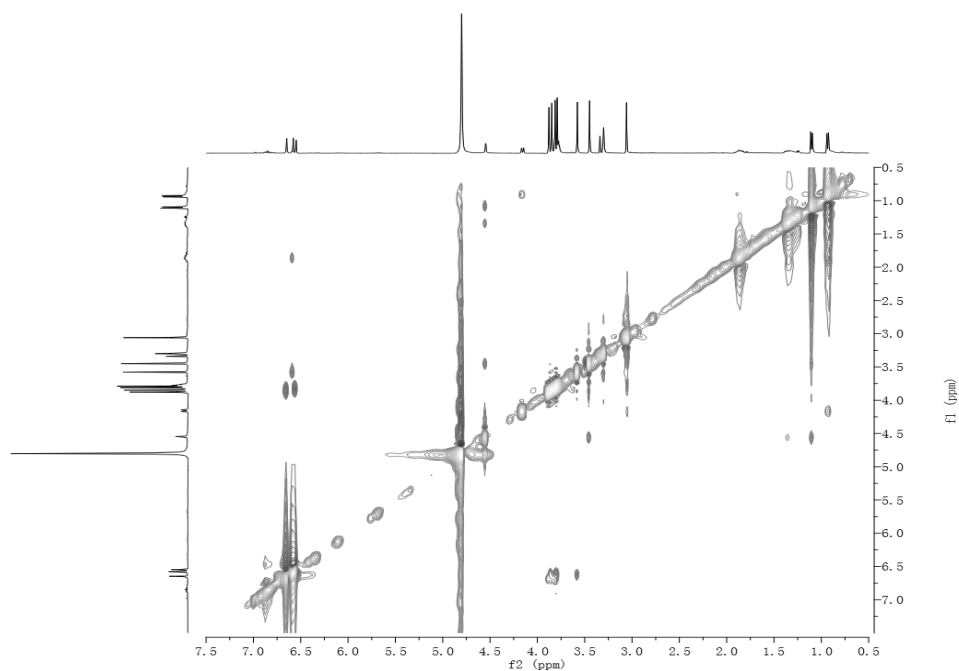

**Chiral HPLC analytical chromatograms of compound 2, 3, 7, 8, 14**

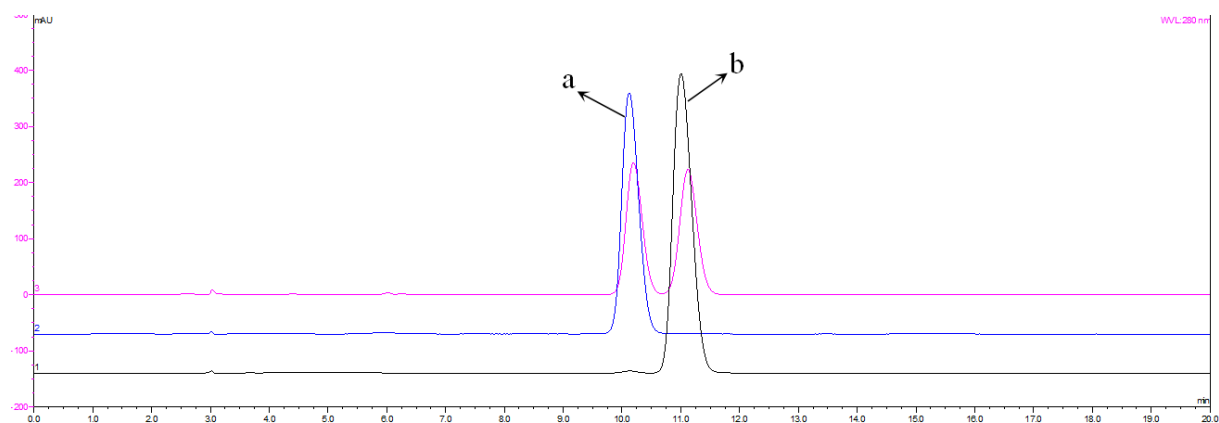

column, Lux Amylose-2 column (5  $\mu\text{m}$ , 4.6  $\times$  250 mm, Phenomenex); mobile phase, MeCN/H<sub>2</sub>O = 35:75; flow rate: 0.7 mL/min; UV detection at 280 nm; peak area of **2a:2b** = 1:1; **2a**,  $t_{\text{R}}$  = 10.1 min; **2b**,  $t_{\text{R}}$  = 11.0 min.

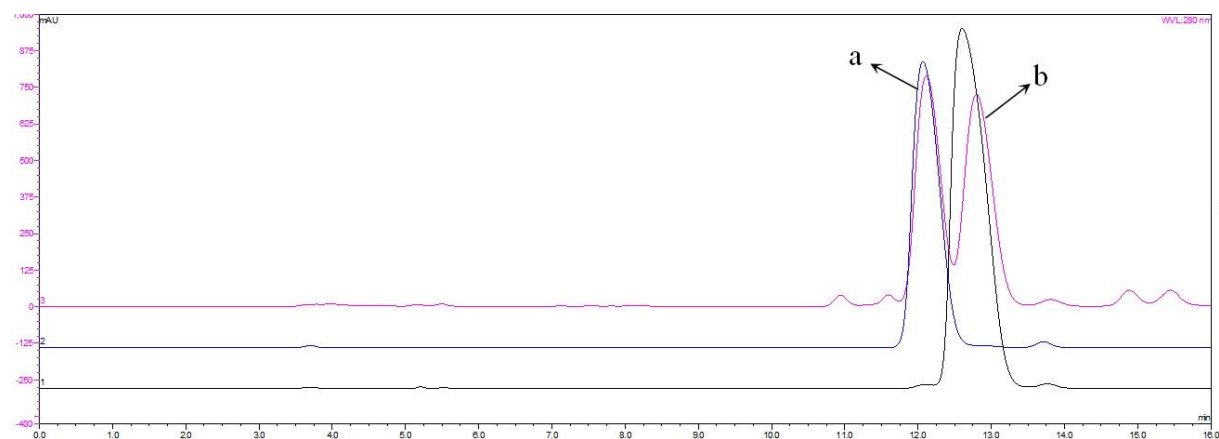

column, Lux Amylose-2 column (5  $\mu$ m, 4.6  $\times$  250 mm, Phenomenex); mobile phase, MeCN/H<sub>2</sub>O = 3:7; flow rate: 0.7 mL/min; UV detection at 280 nm; peak area of **3a:3b** = 1:1; **3a**,  $t_R$  = 12.0 min; **3b**,  $t_R$  = 12.8 min.

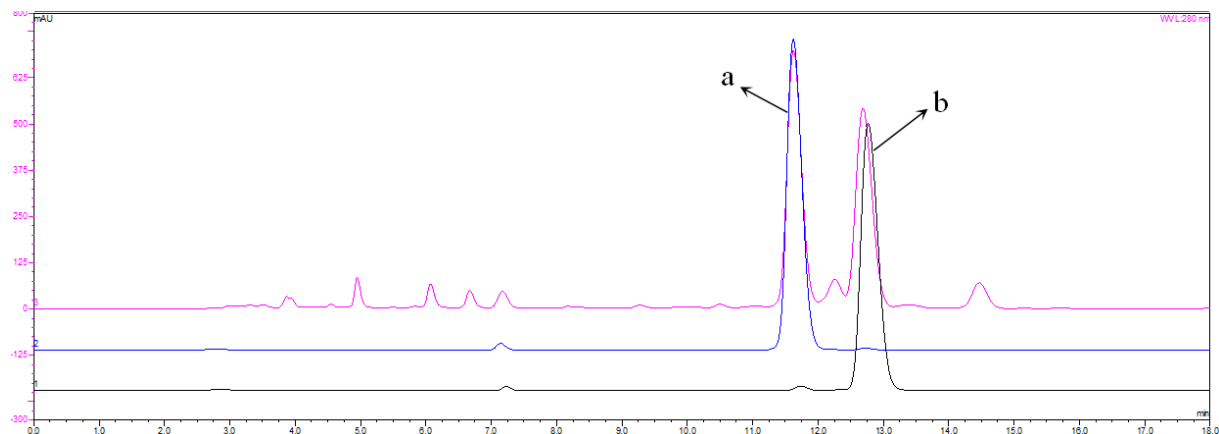

column, Lux Amylose-2 column (5  $\mu$ m, 4.6  $\times$  250 mm, Phenomenex); mobile phase, MeCN/H<sub>2</sub>O = 6:4; flow rate: 0.7 mL/min; UV detection at 280 nm; peak area of **7a:7b** = 1:1; **7a**,  $t_R$  = 11.5 min; **7b**,  $t_R$  = 12.8 min.

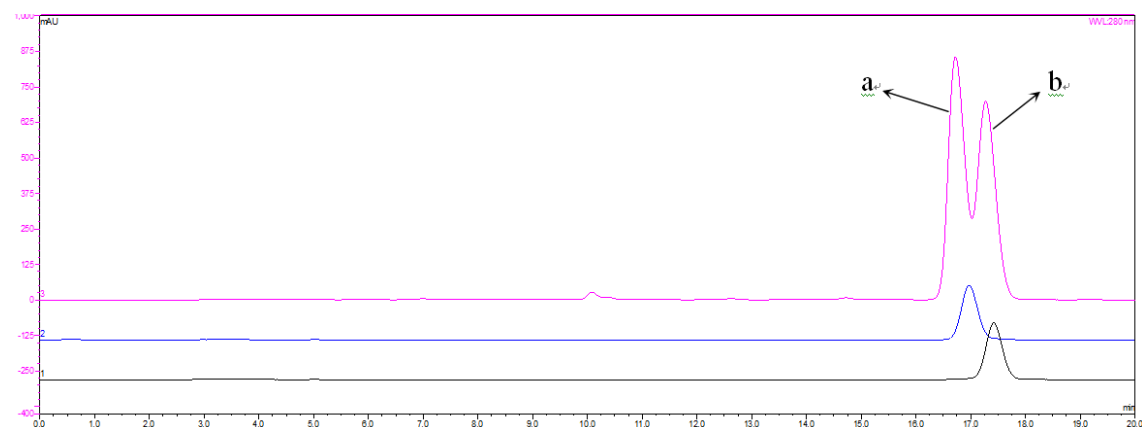

column, Lux Amylose-2 column (5  $\mu$ m, 4.6  $\times$  250 mm, Phenomenex); mobile phase, MeCN/H<sub>2</sub>O = 4:6; flow rate: 0.7 mL/min; UV detection at 280 nm; peak area of **8a:8b** = 1:1; **8a**,  $t_R$  = 21.0 min; **8b**,  $t_R$  = 22.0 min.

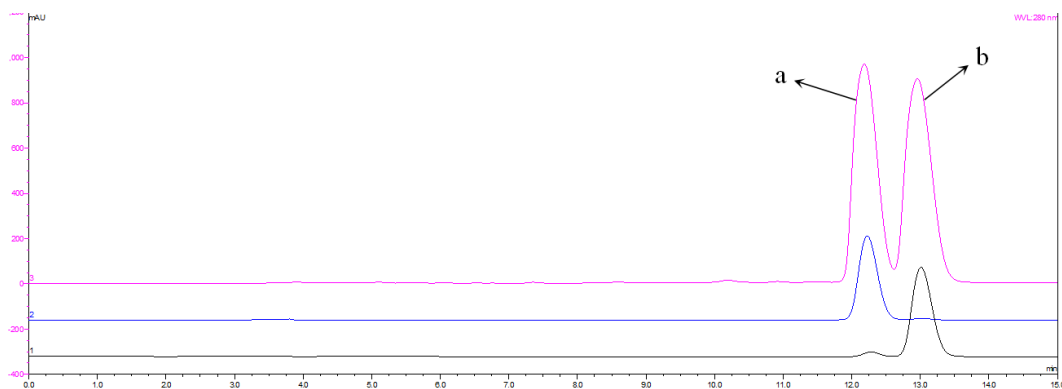

column, Lux Amylose-2 column (5  $\mu$ m, 4.6  $\times$  250 mm, Phenomenex); mobile phase, MeCN/H<sub>2</sub>O = 4:6; flow rate: 0.7 mL/min; UV detection at 280 nm; peak area of **14a:14b** = 1:1; **14a**,  $t_R$  = 12.1 min; **14b**,  $t_R$  = 13.0 min.

### Purity of compound

Purity of all the compounds were determined by HPLC using UV detection (peak area percentage represents the purity of compound), 1, 96.1% (208 nm); 2, 96.4% (208 nm); 2a, 96.4% (280 nm); 2b, 99.0% (280 nm); 3, 97.1% (208 nm); 3a, 98.2% (280 nm); 3b, 98.3% (280 nm); 4, 97.3% (208 nm); 5, 98.2% (208 nm); 6, 95.3% (208 nm); 7, 97.4% (208 nm); 7a, 97.4% (280 nm); 7b, 98.8% (280 nm); 8, 98.2% (208 nm); 8a, 96.6% (280 nm); 8b, 97.4% (280 nm); 9, 95.2% (208 nm); 10, 94.7% (208 nm); 11, 98.9% (208 nm); 12, 96.3% (208 nm); 13, 90.1% (208 nm); 14, 96.7% (208 nm); 14a, 97.2% (280 nm); 14b, 95.1% (280 nm); 15, 97.2% (208 nm); 16, 97.7% (208 nm); 17, 98.7% (208 nm); 18, 97.8% (208 nm); 19, 95.8% (208 nm); 20, 97.3% (208 nm); 21, 96.3% (208 nm); 22, 97.8% (208 nm); 23, 97.7% (208 nm).

### ECD spectrum of 8 and 14

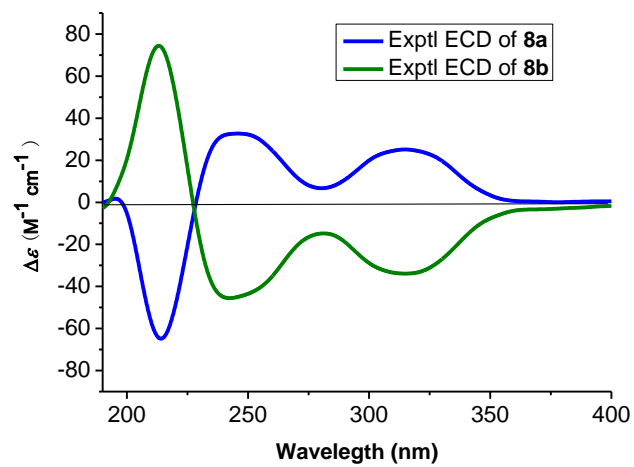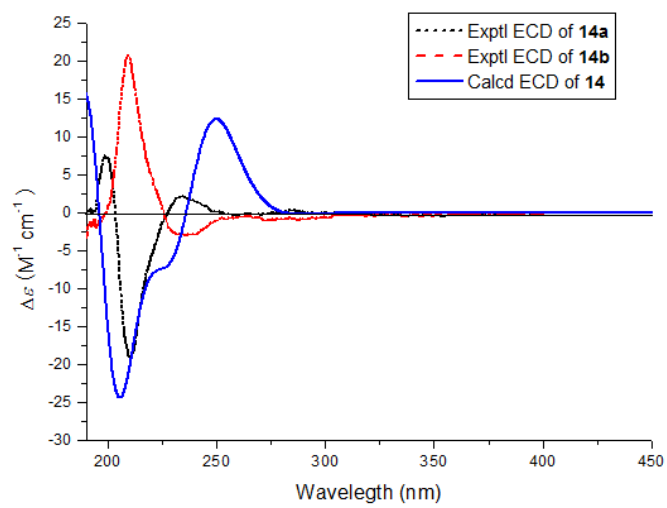

Supplement: c6ra27786a1.pdf [file c6ra27786a1.pdf]
